# Supplementary material for: Perineuronal oligodendrocyte and myelin renewal are epigenetically silenced contributing to cognitive deficits in a murine model of schizophrenia
Source: Research Square preprint supplement (doi:10.21203/rs.3.rs-8000305/v1), 2026-02-04
Supplement: Supplementary file 1 [file 69d0cd129d5ae9cc511d5f5f.xlsx]

## Sheet: Astrocyte_DEGs
gene	p_val	avg_log2FC (MK801/CTL)	pct.1	pct.2	p_val_adj
Xist	3.48e-114	0.919023	0.972	0.638	8.08e-110
Sema3c	3.75e-64	0.709717	0.736	0.488	8.72e-60
Mfge8	4.49e-54	0.938207	0.798	0.692	1.04e-49
Ctnnd2	6.25e-50	-0.576239	0.756	0.894	1.45e-45
Npas3	5.1e-47	-0.593559	0.669	0.849	1.19e-42
Zbtb20	1.08e-45	-0.510341	0.772	0.907	2.52e-41
Mir99ahg	5.4e-43	-0.560711	0.709	0.86	1.26e-38
Luzp2	1.65e-41	-0.815665	0.654	0.796	3.84e-37
Pcdh9	4.69e-41	-0.480267	0.785	0.921	1.09e-36
Mir100hg	6.24e-41	-0.690624	0.471	0.702	1.45e-36
Zswim6	5.8e-39	-1.22902	0.174	0.375	1.35e-34
Rgs20	8.04e-37	-0.615862	0.553	0.758	1.87e-32
Cadm2	2.94e-36	-0.449864	0.799	0.913	6.83e-32
B3galt1	1.83e-35	-0.527982	0.586	0.795	4.25e-31
Ptprt	1.83e-35	-0.567718	0.57	0.756	4.26e-31
Msi2	7.44e-34	-0.46049	0.706	0.869	1.73e-29
Nlgn1	7.9e-34	-0.482588	0.693	0.848	1.84e-29
Negr1	1.3e-32	-0.534949	0.559	0.759	3.01e-28
Nfia	2.77e-31	-0.493542	0.609	0.79	6.43e-27
Bc1	9.13e-31	0.746527	0.519	0.352	2.12e-26
Gabrb1	5.38e-29	-0.410355	0.785	0.899	1.25e-24
Prex2	1.53e-27	-0.489412	0.553	0.739	3.55e-23
Rorb	1.97e-27	-0.533544	0.423	0.64	4.57e-23
Tcf7l2	1.5e-26	-0.729279	0.232	0.425	3.49e-22
Lhfp	5.31e-26	-1.12896	0.11	0.253	1.23e-21
Alcam	6.66e-26	-0.651855	0.255	0.445	1.55e-21
Trps1	9.15e-26	-0.49648	0.444	0.656	2.13e-21
Myo6	3.26e-25	-0.645943	0.263	0.454	7.58e-21
Frmd4a	4.54e-25	-0.381285	0.77	0.875	1.06e-20
Qki	7.43e-25	-0.411354	0.602	0.783	1.73e-20
Adgrb3	2.78e-24	-0.388433	0.691	0.843	6.46e-20
Zeb1	4.82e-24	-0.532412	0.292	0.488	1.12e-19
4930488L21Rik	1.57e-23	-0.828372	0.131	0.278	3.64e-19
Adk	1.93e-23	-0.599118	0.31	0.499	4.48e-19
Fmn2	3.21e-23	-0.537998	0.318	0.509	7.45e-19
Maml2	1.45e-22	-0.493488	0.403	0.596	3.36e-18
Ppp2r2b	2.15e-22	-0.540972	0.336	0.526	4.98e-18
Grid2	7.09e-22	-0.392452	0.575	0.757	1.65e-17
Nckap5	8.39e-22	-0.554159	0.357	0.536	1.95e-17
Pde7b	1.86e-21	-0.607991	0.308	0.478	4.32e-17
Dtna	3.42e-21	-0.35673	0.57	0.753	7.95e-17
Clasp2	4.19e-21	-0.486194	0.346	0.538	9.75e-17
Rgs7	4.28e-21	-0.625414	0.43	0.594	9.95e-17
Sema6d	5.17e-21	-0.590546	0.24	0.41	1.2e-16
Gm6145	8.64e-21	-0.536794	0.291	0.471	2.01e-16
Dclk1	4.59e-20	-0.415977	0.653	0.773	1.07e-15
Dgkb	5.3e-20	-0.418052	0.521	0.697	1.23e-15
Ptprz1	8.68e-20	-0.333763	0.65	0.803	2.02e-15
Meis2	1.72e-19	-0.519439	0.336	0.508	3.99e-15
Hdac4	1.88e-19	-0.611092	0.16	0.306	4.36e-15
ENSMUSG00000095041	2.52e-19	-0.60589	0.208	0.361	5.86e-15
Pitpnc1	4.3e-19	-0.424246	0.469	0.647	9.99e-15
Sox6	5.9e-19	-0.579925	0.261	0.426	1.37e-14
Unc13c	5.95e-19	-0.779557	0.19	0.332	1.38e-14
Myo10	5.99e-19	-0.662688	0.17	0.312	1.39e-14
Pbx1	1.62e-18	-0.370802	0.673	0.822	3.77e-14
C130071C03Rik	2.16e-18	-0.557777	0.28	0.443	5.02e-14
Gli3	2.68e-18	-0.485028	0.257	0.425	6.23e-14
Grm3	3.03e-18	-0.391891	0.589	0.733	7.04e-14
Zfp608	3.41e-18	-0.604895	0.179	0.32	7.92e-14
Ncam2	3.69e-18	-0.497699	0.27	0.432	8.58e-14
Cdh20	4.82e-18	-0.697481	0.165	0.3	1.12e-13
Phlpp1	4.86e-18	-0.451859	0.293	0.464	1.13e-13
Fam13c	7.21e-18	-0.580801	0.17	0.309	1.68e-13
Mdga2	1.22e-17	-0.3247	0.677	0.807	2.84e-13
Slc4a4	2.78e-17	-0.409665	0.474	0.641	6.46e-13
Tle4	4.33e-17	-0.589209	0.158	0.29	1.01e-12
Gpc6	5.31e-17	-0.37835	0.477	0.641	1.24e-12
Pcdh7	7.85e-17	-0.387421	0.479	0.633	1.82e-12
Ccdc88a	1.12e-16	-0.484413	0.264	0.418	2.6e-12
Znrf3	6.03e-16	-0.458427	0.252	0.406	1.4e-11
Strn3	8.15e-16	-0.605454	0.167	0.294	1.89e-11
Mapk10	8.3e-16	-0.485419	0.264	0.41	1.93e-11
Glis3	1.03e-15	-0.506902	0.238	0.386	2.4e-11
Psd3	1.05e-15	-0.538312	0.231	0.368	2.44e-11
Akt3	1.53e-15	-0.502602	0.211	0.349	3.56e-11
Plcb1	2.12e-15	-0.383351	0.472	0.637	4.94e-11
Csgalnact1	2.73e-15	-0.599538	0.203	0.33	6.35e-11
Phf21a	2.77e-15	-0.406861	0.293	0.453	6.44e-11
Tcf12	5.44e-15	-0.665503	0.157	0.276	1.26e-10
St6galnac5	6.23e-15	-0.481471	0.324	0.462	1.45e-10
Ephb1	7.71e-15	-0.573469	0.174	0.297	1.79e-10
Bach2	1.31e-14	-0.493062	0.223	0.356	3.04e-10
Ank2	1.63e-14	-0.270369	0.657	0.803	3.78e-10
Zfpm2	1.94e-14	-0.480907	0.221	0.356	4.51e-10
Adcy2	3.06e-14	-0.40296	0.327	0.475	7.11e-10
Ddhd1	4.33e-14	-0.411824	0.26	0.403	1.01e-09
Sash1	4.37e-14	-0.419492	0.215	0.351	1.01e-09
Sfxn5	5.05e-14	-0.351288	0.436	0.592	1.17e-09
Rfx4	5.1e-14	-0.5132	0.17	0.291	1.19e-09
Sgip1	1.08e-13	-0.348748	0.331	0.485	2.51e-09
Setbp1	1.25e-13	-0.473311	0.202	0.328	2.9e-09
Nfib	1.3e-13	-0.3536	0.408	0.567	3.02e-09
Hivep3	2.76e-13	-0.319012	0.411	0.564	6.41e-09
Dennd1a	2.79e-13	-0.400092	0.399	0.544	6.49e-09
Ehbp1	3.04e-13	-0.484374	0.189	0.311	7.06e-09
Hdac8	3.17e-13	-0.425672	0.32	0.461	7.38e-09
Ogt	3.24e-13	-0.436754	0.211	0.337	7.54e-09
Hes5	3.27e-13	-0.369997	0.279	0.414	7.6e-09
Slco1c1	4.28e-13	-0.395383	0.367	0.521	9.94e-09
Nol4	4.72e-13	-0.59009	0.19	0.301	1.1e-08
Nt5c2	5.58e-13	-0.568138	0.142	0.248	1.3e-08
Hdac9	9e-13	-0.564463	0.211	0.329	2.09e-08
Dcc	1.03e-12	-0.446154	0.397	0.531	2.4e-08
Hip1	1.13e-12	-0.499024	0.136	0.241	2.64e-08
Syne1	1.41e-12	-0.353933	0.387	0.539	3.28e-08
Add3	1.53e-12	-0.513033	0.185	0.301	3.56e-08
Fbxl17	2.02e-12	-0.352373	0.229	0.359	4.7e-08
Tenm3	2.07e-12	-0.367753	0.327	0.465	4.81e-08
Magi2	2.15e-12	-0.27342	0.638	0.77	4.99e-08
Baz2b	2.86e-12	-0.363311	0.191	0.311	6.64e-08
Pde8b	2.96e-12	-0.467927	0.237	0.363	6.88e-08
Dock1	3.08e-12	-0.376533	0.233	0.361	7.17e-08
Ptprm	3.67e-12	-0.479338	0.161	0.27	8.53e-08
Arhgap5	3.81e-12	-0.319426	0.307	0.446	8.85e-08
Mbd5	5.84e-12	-0.450713	0.205	0.322	1.36e-07
Nwd1	8.19e-12	-0.402333	0.215	0.339	1.9e-07
Ptch1	8.33e-12	-0.403291	0.175	0.287	1.94e-07
Fmnl2	1.36e-11	-0.40685	0.286	0.416	3.16e-07
Lama2	1.45e-11	-0.374474	0.289	0.418	3.36e-07
Klf12	1.78e-11	-0.404132	0.247	0.376	4.14e-07
Rfx3	1.88e-11	-0.443174	0.194	0.305	4.38e-07
Cdh10	1.98e-11	-0.330947	0.364	0.505	4.59e-07
Sox5	2.66e-11	-0.383239	0.257	0.377	6.18e-07
Cdh19	2.92e-11	-0.320698	0.266	0.395	6.78e-07
Fermt2	2.92e-11	-0.502521	0.168	0.273	6.8e-07
Mast4	2.96e-11	-0.343589	0.292	0.429	6.89e-07
Clmn	3.22e-11	-0.341805	0.272	0.407	7.47e-07
Grip1	3.28e-11	-0.448603	0.202	0.314	7.63e-07
Fchsd2	3.58e-11	-0.458008	0.15	0.251	8.32e-07
Rbm6	6.23e-11	-0.484918	0.153	0.253	1.45e-06
Egfr	6.41e-11	-0.399448	0.154	0.255	1.49e-06
Sorbs1	8.06e-11	-0.423195	0.254	0.369	1.87e-06
Phka1	1.02e-10	-0.329717	0.291	0.423	2.37e-06
Nr3c2	1.11e-10	-0.394656	0.146	0.246	2.59e-06
Nf1	1.14e-10	-0.349121	0.177	0.284	2.66e-06
Gnaq	1.38e-10	-0.429557	0.211	0.32	3.2e-06
Lncpint	1.66e-10	-0.393578	0.203	0.312	3.85e-06
Gria2	1.66e-10	-0.274593	0.505	0.647	3.86e-06
Fgfr2	1.81e-10	-0.456312	0.187	0.292	4.2e-06
Crebbp	1.91e-10	-0.409038	0.188	0.295	4.45e-06
Tjp1	1.95e-10	-0.331082	0.372	0.502	4.54e-06
Gpm6a	2.13e-10	-0.269273	0.555	0.696	4.95e-06
Kmt2c	2.23e-10	-0.346568	0.19	0.297	5.19e-06
Thrb	2.63e-10	-0.460577	0.204	0.309	6.12e-06
Sptbn1	2.79e-10	-0.335575	0.228	0.338	6.49e-06
Exoc4	2.8e-10	-0.345117	0.224	0.34	6.52e-06
Slc7a11	3.93e-10	-0.325141	0.332	0.459	9.13e-06
Bmpr1b	4.68e-10	-0.324373	0.356	0.489	1.09e-05
Arhgef26	4.71e-10	-0.408517	0.197	0.3	1.09e-05
Gpatch8	4.73e-10	-0.387153	0.189	0.293	1.1e-05
Apc	6.79e-10	-0.3716	0.221	0.33	1.58e-05
Phactr3	6.9e-10	-0.306819	0.175	0.279	1.6e-05
Tox	8.08e-10	-0.307081	0.246	0.362	1.88e-05
Pou2f1	9.35e-10	-0.334648	0.226	0.338	2.17e-05
Vcl	1.1e-09	-0.380013	0.211	0.318	2.55e-05
Dmd	1.21e-09	-0.341935	0.442	0.56	2.81e-05
Prkd1	1.22e-09	-0.255645	0.281	0.401	2.85e-05
Kcnn2	1.39e-09	-0.340443	0.249	0.357	3.23e-05
Rgs6	1.61e-09	-0.317692	0.304	0.422	3.73e-05
Ncoa1	1.62e-09	-0.29301	0.291	0.407	3.77e-05
Nhsl1	1.72e-09	-0.359975	0.285	0.403	3.99e-05
Limch1	2.53e-09	-0.29384	0.239	0.354	5.88e-05
Eps15	2.64e-09	-0.32623	0.206	0.312	6.14e-05
Tnrc6a	2.7e-09	-0.319083	0.191	0.295	6.28e-05
Mllt10	3.23e-09	-0.360345	0.18	0.28	7.51e-05
Kif1b	3.38e-09	-0.263165	0.437	0.564	7.85e-05
Fars2	4.51e-09	-0.29717	0.237	0.346	0.000104849
Tmcc1	4.72e-09	-0.296612	0.304	0.429	0.000109724
Nim1k	5.92e-09	-0.277451	0.226	0.334	0.000137525
Chd9	9.52e-09	-0.271734	0.298	0.419	0.000221151
Tra2a	1.57e-08	-0.316385	0.257	0.365	0.000365947
Ssbp2	1.69e-08	-0.323161	0.213	0.313	0.00039369
Foxn3	1.72e-08	-0.26947	0.245	0.352	0.000400143
Mapk4	2.4e-08	-0.270524	0.24	0.343	0.000556749
Pafah1b1	4.32e-08	-0.281919	0.244	0.349	0.00100347
Ctnna2	4.77e-08	-0.389104	0.387	0.496	0.00110886
Rasa2	6.28e-08	-0.285196	0.278	0.383	0.00146036
Akap6	1.13e-07	-0.254305	0.29	0.395	0.00262495
Srgap3	1.5e-07	-0.263369	0.264	0.371	0.00348338

## Sheet: Endothelial_DEGs
gene	p_val	avg_log2FC (MK801/CTL)	pct.1	pct.2	p_val_adj
Xist	6.52916e-17	1.11851	0.902	0.629	1.51725e-12
Slc38a2	2.26766e-11	1.92626	0.368	0.125	5.2696e-07
Ebf1	6.3321e-09	-2.03426	0.141	0.381	0.000147145
Ptgds	1.75539e-08	1.75609	0.681	0.571	0.000407918
Bc1	6.95288e-08	1.16131	0.46	0.248	0.00161571
Utrn	1.59146e-07	-1.12349	0.27	0.509	0.00369823
Sema3c	1.97445e-07	0.615477	0.681	0.429	0.00458823
Pcolce	2.19503e-07	1.26524	0.362	0.165	0.00510082
Syt1	2.5942e-06	-0.823632	0.325	0.586	0.0602841
Hbb-bs	3.78857e-06	-0.917736	0.202	0.406	0.0880388
Ank2	6.25629e-06	0.769165	0.626	0.441	0.145384
Actb	8.26976e-06	-1.08036	0.442	0.609	0.192173
Atp1a2	1.90916e-05	0.951845	0.607	0.464	0.443651
mt-Nd4	1.93711e-05	1.02749	0.669	0.549	0.450145
Hba-a2	2.14529e-05	-0.925614	0.196	0.376	0.498523
Nbl1	2.31149e-05	1.34844	0.288	0.148	0.537145
Lmo4	2.68508e-05	1.15328	0.301	0.145	0.62396
Crip1	2.71693e-05	-2.16464	0.11	0.263	0.631359
Flt1	4.83235e-05	-1.25663	0.166	0.333	1
mt-Nd2	6.04274e-05	0.995965	0.62	0.501	1
Ly6c1	6.33235e-05	-0.339869	0.172	0.361	1
Prkg1	6.43632e-05	-1.05871	0.227	0.396	1
Cped1	0.000127421	0.438606	0.509	0.316	1
Apod	0.000135777	0.791035	0.564	0.429	1
Alcam	0.000137967	0.849555	0.411	0.258	1
Slc3a2	0.000142	0.883806	0.485	0.326	1
Cldn5	0.000156383	-0.551162	0.141	0.303	1
Aebp1	0.000195623	1.10893	0.27	0.14	1
Dock4	0.000264711	-1.24463	0.129	0.266	1
Dcn	0.000285233	0.52805	0.294	0.155	1
Laptm4a	0.000347201	0.731116	0.546	0.388	1
Igfbp2	0.000370249	1.12055	0.362	0.231	1
Ptprm	0.000432614	-1.14725	0.166	0.311	1
Ergic3	0.000455832	0.876273	0.288	0.16	1
Ranbp3l	0.000486526	1.00744	0.374	0.231	1
ENSMUSG00000121513	0.000579186	-1.43705	0.282	0.416	1
Igfbp7	0.000811384	-0.586558	0.233	0.393	1
Itm2c	0.00105353	0.74715	0.534	0.426	1
Fxyd5	0.00108555	1.19446	0.288	0.178	1
Ctsd	0.0011833	0.859524	0.344	0.211	1
Sst	0.00200126	-0.547676	0.466	0.599	1
Dlc1	0.00362265	-1.4377	0.239	0.341	1
Oxr1	0.00364821	-1.05248	0.129	0.241	1
Mef2c	0.00368753	-1.08408	0.141	0.248	1
Klf12	0.00372197	-0.597576	0.196	0.328	1
Grm7	0.00377818	-0.854445	0.19	0.311	1
Ly6a	0.00391671	-0.482107	0.16	0.283	1
Lrp1	0.00406109	0.599812	0.319	0.211	1
Ftl1	0.00439427	0.630451	0.411	0.301	1
Nrg3	0.00452535	-0.359227	0.368	0.521	1
Ppib	0.00459026	0.801661	0.319	0.213	1
Slc6a13	0.00460254	0.899441	0.276	0.17	1
Nebl	0.0047893	-1.06281	0.166	0.271	1
Adgrl1	0.00532141	0.617465	0.252	0.148	1
Cd63	0.00564831	0.839924	0.325	0.223	1
Fbxl17	0.00672963	-0.631999	0.16	0.276	1
Bicc1	0.0110123	0.440451	0.27	0.168	1
Myl6	0.0127865	-0.613152	0.294	0.401	1
Dlg2	0.0128443	-0.267811	0.491	0.614	1
Sparc	0.0142821	0.626238	0.497	0.393	1
Mir99ahg	0.0277368	0.308722	0.485	0.376	1
Sptbn1	0.0279626	-0.469267	0.387	0.491	1

## Sheet: Excitatory Neuron_DEGs
gene	p_val	avg_log2FC (MK801/CTL)	pct.1	pct.2	p_val_adj
Xist	0	1.33944	0.97	0.597	0
Sema3c	0	0.79792	0.863	0.612	0
Bc1	0	0.685564	0.865	0.622	0
Gm11867	0	0.690329	0.579	0.369	0
Hbb-bs	0	-1.95158	0.08	0.261	0
Apoe	1.87e-292	-1.15872	0.471	0.674	4.33e-288
Naaladl2	3.92e-250	0.317696	0.715	0.584	9.1e-246
ENSMUSG00000095041	7.54e-249	-0.521711	0.622	0.778	1.75e-244
Sst	7.78e-212	-0.970193	0.447	0.619	1.81e-207
Grik4	2.13e-191	0.890813	0.605	0.501	4.94e-187
Actb	3.06e-170	-1.07488	0.291	0.44	7.12e-166
Syngap1	2.55e-145	-0.832715	0.213	0.351	5.93e-141
Pam	6.09e-141	-0.524023	0.426	0.59	1.42e-136
Npy	1e-135	-0.898665	0.164	0.286	2.33e-131
Cntnap2	1.97e-117	-0.364207	0.655	0.764	4.57e-113
Ptgds	9.82e-116	-0.861946	0.213	0.328	2.28e-111
Dynlt1a	6.47e-115	-0.83005	0.209	0.325	1.5e-110
A330076H08Rik	2.7e-109	-0.560095	0.157	0.277	6.28e-105
Zcchc7	3.56e-95	-0.408834	0.233	0.366	8.28e-91
Prkg1	1.33e-91	-0.394605	0.512	0.624	3.09e-87
Ahi1	7.48e-88	-0.387348	0.362	0.495	1.74e-83
ENSMUSG00000121395	2.04e-87	-0.626506	0.278	0.389	4.75e-83
Cdr1os	1.85e-84	-0.385647	0.293	0.423	4.3e-80
Grik2	2.85e-83	-0.314838	0.545	0.67	6.62e-79
Prrc2c	6.07e-83	-0.572882	0.166	0.27	1.41e-78
Xkr4	6.34e-80	-0.310555	0.566	0.67	1.47e-75
Mir100hg	1.32e-78	-0.360372	0.364	0.491	3.07e-74
Rit2	1.02e-77	-0.430542	0.156	0.257	2.38e-73
Arglu1	2.18e-77	-0.420511	0.294	0.414	5.07e-73
Clasp2	1.78e-73	-0.394711	0.417	0.547	4.14e-69
Cdh2	2.43e-73	-0.353988	0.328	0.452	5.65e-69
Grip1	7.71e-73	-0.345397	0.369	0.493	1.79e-68
Ube2g1	3.2e-72	-0.400488	0.194	0.3	7.44e-68
Cobl	9.64e-72	-0.355458	0.268	0.385	2.24e-67
Slc8a1	9.71e-71	-0.319914	0.556	0.658	2.26e-66
Gsk3b	1.94e-70	-0.41568	0.193	0.297	4.51e-66
Ncam1	3.25e-70	-0.282569	0.543	0.666	7.55e-66
Pde4b	6.72e-69	-0.347176	0.435	0.549	1.56e-64
Mllt3	2.08e-65	-0.341106	0.235	0.345	4.84e-61
Epha5	9.24e-65	-0.286588	0.501	0.611	2.15e-60
Frmd4a	1.22e-64	-0.265619	0.574	0.678	2.84e-60
Sh3rf3	2.16e-64	-0.305248	0.294	0.413	5.02e-60
Pak3	1.99e-63	-0.349154	0.223	0.327	4.63e-59
Snhg14	4.96e-62	-0.271316	0.531	0.649	1.15e-57
Srrm2	1.46e-61	-0.33511	0.416	0.534	3.4e-57
Cyrib	1.78e-61	-0.312145	0.207	0.309	4.14e-57
Robo1	2.48e-61	-0.3028	0.567	0.67	5.76e-57
Gnb1	1.15e-60	-0.350031	0.24	0.346	2.66e-56
Lncpint	2.4e-60	-0.300224	0.427	0.547	5.57e-56
Zfand3	2.6e-59	-0.321218	0.22	0.322	6.05e-55
Faf1	1.22e-56	-0.274121	0.22	0.322	2.83e-52
Dnm3	1.74e-56	-0.294517	0.277	0.385	4.04e-52
Ppp2r2b	1.98e-56	-0.257598	0.53	0.633	4.6e-52
Tcf20	3.78e-56	-0.32822	0.285	0.393	8.78e-52
Nf1	7.3e-55	-0.283966	0.237	0.34	1.7e-50
Enox1	1.19e-53	-0.276725	0.371	0.479	2.77e-49
Zdhhc14	2.13e-52	-0.269957	0.286	0.39	4.94e-48
Ppm1h	2.9e-51	-0.283436	0.312	0.416	6.73e-47
Slc1a2	1.96e-49	-0.285409	0.433	0.54	4.54e-45
Tsc22d1	5.77e-47	-0.254717	0.291	0.394	1.34e-42
Pan3	6.47e-43	-0.267609	0.319	0.422	1.5e-38

## Sheet: Inhibitory Neuron_DEGs
gene	p_val	avg_log2FC (MK801/CTL)	pct.1	pct.2	p_val_adj
Xist	4.86292e-150	1.24812	0.976	0.495	1.13005e-145
Tecr	6.82496e-75	0.953119	0.877	0.743	1.58598e-70
ENSMUSG00000095041	5.4828e-70	-1.12985	0.426	0.717	1.27409e-65
Ly6h	7.22701e-63	0.979137	0.813	0.64	1.67941e-58
Slc22a17	8.03228e-58	0.913226	0.793	0.647	1.86654e-53
Bsg	1.56776e-51	0.815541	0.816	0.664	3.64316e-47
Slc32a1	1.42977e-44	1.0562	0.634	0.434	3.3225e-40
Rabac1	2.79e-41	0.85638	0.728	0.548	6.48341e-37
Grina	3.29497e-41	0.956748	0.661	0.484	7.65686e-37
Psap	6.35096e-41	0.806441	0.765	0.618	1.47584e-36
Pcsk1n	2.74097e-39	0.751492	0.834	0.729	6.36946e-35
Thy1	1.98097e-38	0.891968	0.729	0.598	4.60338e-34
Igsf8	5.19515e-37	0.899649	0.645	0.48	1.20725e-32
Sema3c	7.19387e-35	0.304865	0.834	0.647	1.67171e-30
mt-Co3	4.70251e-34	0.964653	0.695	0.538	1.09277e-29
Podxl2	5.89778e-34	1.09124	0.516	0.331	1.37053e-29
mt-Nd1	5.97567e-33	0.931806	0.606	0.427	1.38863e-28
Vgf	1.90995e-31	0.987001	0.609	0.452	4.43833e-27
Itm2b	3.21694e-31	0.750274	0.736	0.626	7.47553e-27
Stmn3	5.21255e-30	0.732708	0.698	0.57	1.21129e-25
Caly	1.25294e-29	0.786442	0.701	0.57	2.91157e-25
Atp6v0b	4.4331e-29	0.745673	0.708	0.606	1.03016e-24
Aplp1	6.98897e-29	0.752326	0.682	0.53	1.6241e-24
mt-Nd4	8.39409e-29	1.11927	0.457	0.282	1.95062e-24
C1qtnf4	1.69859e-27	1.11547	0.465	0.305	3.94718e-23
Robo1	4.02787e-26	-0.582104	0.591	0.739	9.35997e-22
Scg5	1.55794e-25	0.672423	0.688	0.573	3.62034e-21
mt-Atp6	7.60924e-25	0.858933	0.647	0.502	1.76823e-20
Rnasek	3.00149e-24	0.738605	0.633	0.51	6.97485e-20
Resp18	1.1325e-23	0.938896	0.564	0.435	2.6317e-19
Tmem59l	1.27073e-23	0.885848	0.566	0.422	2.95291e-19
mt-Cytb	1.54391e-23	0.91762	0.568	0.418	3.58773e-19
mt-Co1	8.58522e-22	0.814412	0.612	0.469	1.99503e-17
Faim2	1.09486e-21	0.753094	0.562	0.426	2.54423e-17
Gpr162	1.21306e-21	0.913355	0.448	0.302	2.81892e-17
Chga	2.14892e-21	0.937679	0.413	0.264	4.99365e-17
Gapdh	9.48057e-21	0.936965	0.409	0.263	2.2031e-16
mt-Co2	4.94749e-20	0.788239	0.523	0.37	1.1497e-15
Ccser1	6.69573e-20	-0.517223	0.626	0.751	1.55595e-15
Il1rapl1	6.96725e-20	-0.466043	0.734	0.841	1.61905e-15
Gaa	1.80992e-19	0.787989	0.548	0.427	4.20589e-15
Npdc1	3.4704e-19	0.741347	0.519	0.4	8.06452e-15
Tm2d3	3.91492e-19	1.03282	0.363	0.231	9.09749e-15
Pld3	4.66377e-19	0.77346	0.534	0.406	1.08377e-14
Negr1	6.21425e-19	-0.473729	0.673	0.803	1.44407e-14
Ctsb	2.03712e-18	0.720112	0.539	0.412	4.73386e-14
Rims2	2.32532e-18	-0.455383	0.567	0.709	5.40358e-14
Fkbp2	1.19339e-17	0.7937	0.462	0.324	2.7732e-13
Plcb1	2.78456e-17	-0.422226	0.667	0.783	6.47075e-13
Cd81	3.06664e-17	0.695515	0.587	0.482	7.12626e-13
Slc3a2	5.44818e-17	0.776798	0.476	0.353	1.26605e-12
Ptprn	7.63928e-17	0.624495	0.564	0.449	1.77522e-12
Dipk1b	5.18655e-16	0.987288	0.323	0.206	1.20525e-11
Ctnna2	6.27461e-16	-0.360157	0.702	0.803	1.45809e-11
mt-Nd2	7.8494e-16	0.898168	0.414	0.289	1.82404e-11
Ubb	1.07739e-15	0.651065	0.543	0.428	2.50364e-11
Frmd4a	1.45643e-15	-0.389744	0.614	0.736	3.38445e-11
Snhg14	5.66965e-15	-0.424163	0.59	0.724	1.31751e-10
Pde10a	6.26389e-15	-0.412639	0.67	0.774	1.4556e-10
Sv2a	9.28665e-15	0.614328	0.538	0.431	2.15803e-10
Cox4i1	9.86832e-15	0.634995	0.529	0.419	2.2932e-10
Gabrg3	1.42745e-14	-0.435655	0.581	0.701	3.3171e-10
Cdr1os	1.57204e-14	-0.662343	0.226	0.358	3.6531e-10
Ergic3	1.82132e-14	0.858013	0.363	0.25	4.23239e-10
Nav3	1.91585e-14	-0.424951	0.64	0.758	4.45206e-10
Hspa8	2.33488e-14	0.889615	0.337	0.221	5.42579e-10
Nlk	4.45855e-14	-0.627618	0.253	0.388	1.03608e-09
Nsg2	4.78057e-14	0.589358	0.486	0.378	1.11091e-09
Gpatch8	5.13782e-14	-0.511846	0.349	0.493	1.19393e-09
Tmem179	5.88731e-14	1.15303	0.244	0.141	1.36809e-09
Olfm2	5.9124e-14	0.888456	0.392	0.285	1.37392e-09
Lncpint	8.35616e-14	-0.594016	0.282	0.416	1.9418e-09
Phactr1	8.48177e-14	-0.548855	0.496	0.625	1.97099e-09
Ddrgk1	1.12494e-13	1.16555	0.247	0.146	2.61413e-09
Gm1673	1.81015e-13	0.85924	0.351	0.243	4.20644e-09
Nenf	3.42751e-13	0.760373	0.378	0.266	7.96484e-09
Antkmt	3.78936e-13	0.759506	0.4	0.287	8.80571e-09
Agbl4	9.26942e-13	-0.447668	0.39	0.537	2.15403e-08
Enox1	1.48249e-12	-0.454999	0.476	0.594	3.445e-08
Ppp2r2b	1.59257e-12	-0.468977	0.488	0.601	3.70081e-08
Pcdh9	1.64309e-12	-0.365081	0.705	0.807	3.81821e-08
Ppib	1.68661e-12	0.83772	0.31	0.206	3.91935e-08
Sh3rf3	3.17034e-12	-0.451825	0.361	0.489	7.36723e-08
Pgrmc1	4.52326e-12	0.755045	0.365	0.263	1.05112e-07
Aldoa	4.72793e-12	0.785772	0.368	0.264	1.09868e-07
5330434G04Rik	5.05322e-12	-0.412056	0.354	0.494	1.17427e-07
Samd12	1.51247e-11	-0.436187	0.375	0.501	3.51468e-07
A330076H08Rik	2.06333e-11	-0.579728	0.194	0.306	4.79477e-07
Tafa2	3.72903e-11	-0.532544	0.354	0.471	8.66553e-07
Cacna1a	4.65324e-11	-0.356879	0.547	0.661	1.08132e-06
Cyrib	4.85524e-11	-0.557661	0.212	0.328	1.12826e-06
Prkg1	5.30035e-11	-0.56211	0.289	0.396	1.2317e-06
Dip2c	6.89376e-11	-0.433013	0.473	0.587	1.60197e-06
Mapk10	1.07746e-10	-0.373477	0.495	0.62	2.5038e-06
Ppm1e	1.14299e-10	-0.461319	0.325	0.447	2.65609e-06
Rock2	1.62064e-10	-0.548994	0.204	0.312	3.76603e-06
Clasp2	2.33145e-10	-0.440356	0.385	0.515	5.41783e-06
Arih1	4.37807e-10	-0.495951	0.194	0.299	1.01738e-05
Tmem178b	5.84404e-10	-0.386941	0.451	0.564	1.35804e-05
Pak3	7.15747e-10	-0.441873	0.257	0.374	1.66325e-05
Dpp10	7.63702e-10	-0.407131	0.677	0.784	1.77469e-05
Akt3	1.05942e-09	-0.456621	0.284	0.399	2.46188e-05
Gabrb3	1.25917e-09	-0.342141	0.394	0.523	2.92606e-05
Fgf13	1.40201e-09	-0.562694	0.316	0.427	3.25799e-05
Gabrb1	1.59952e-09	-0.268892	0.459	0.595	3.71697e-05
Mir100hg	1.66279e-09	-0.406601	0.398	0.514	3.864e-05
Klf12	1.87267e-09	-0.421918	0.453	0.562	4.35171e-05
Fam135b	2.81679e-09	-0.426587	0.266	0.378	6.54566e-05
Dok6	2.90592e-09	-0.544562	0.231	0.338	6.75277e-05
Mef2c	3.05213e-09	-0.329054	0.43	0.548	7.09254e-05
Sik3	3.85767e-09	-0.445627	0.309	0.42	8.96445e-05
Wwox	4.51095e-09	-0.37451	0.378	0.493	0.000104825
Cadm2	4.86523e-09	-0.314808	0.652	0.761	0.000113058
Ahi1	5.6276e-09	-0.425496	0.3	0.412	0.000130774
Mllt3	1.12692e-08	-0.445941	0.22	0.321	0.000261873
Hcn1	1.19041e-08	-0.311908	0.511	0.619	0.000276627
Setbp1	2.41418e-08	-0.349909	0.437	0.542	0.000561007
Ncald	2.51174e-08	-0.382018	0.292	0.396	0.000583679
Dlc1	2.61888e-08	-0.446974	0.283	0.383	0.000608575
Map2	2.70581e-08	-0.326701	0.335	0.448	0.000628776
Csmd3	2.76133e-08	-0.380796	0.449	0.55	0.000641677
Prkce	3.55942e-08	-0.286433	0.508	0.628	0.000827139
Stxbp5l	4.82219e-08	-0.362092	0.308	0.422	0.00112058
Cacna1d	4.899e-08	-0.320331	0.345	0.46	0.00113843
Lrrc7	5.94088e-08	-0.291783	0.517	0.632	0.00138054
Thrb	8.92127e-08	-0.3085	0.524	0.631	0.00207312
Fbxl17	1.44173e-07	-0.343584	0.349	0.456	0.00335028
Msi2	4.87463e-07	-0.318024	0.283	0.384	0.0113277
Sorbs2	7.1584e-07	-0.283057	0.453	0.555	0.0166347
Trio	1.18985e-06	-0.270685	0.365	0.47	0.0276497

## Sheet: Microglia_DEGs
gene	p_val	avg_log2FC (MK801/CTL)	pct.1	pct.2	p_val_adj
Sema3c	1.83402e-19	0.732585	0.72	0.464	4.26188e-15
Xist	5.66755e-19	0.707487	0.917	0.695	1.31703e-14
Tanc2	5.23514e-18	-0.824831	0.624	0.792	1.21654e-13
Bc1	1.04358e-13	1.51899	0.408	0.228	2.42506e-09
Lyn	4.31061e-13	-0.854378	0.371	0.607	1.0017e-08
Elmo1	4.42385e-13	-0.69048	0.544	0.725	1.02802e-08
Plxdc2	9.87958e-13	-0.720132	0.507	0.706	2.29582e-08
Inpp5d	2.95708e-12	-0.748895	0.435	0.653	6.87165e-08
Epb41l2	1.01743e-11	-0.944797	0.333	0.541	2.3643e-07
Rreb1	2.1087e-10	-0.761822	0.323	0.53	4.90019e-06
Slc8a1	2.44411e-10	-0.6084	0.579	0.726	5.67962e-06
Lrmda	2.44852e-10	-0.723532	0.371	0.579	5.68987e-06
Pde3b	2.98082e-10	-0.855704	0.299	0.502	6.92682e-06
Cd81	1.68446e-09	0.516318	0.763	0.634	3.91435e-05
Ldlrad4	2.87159e-09	-0.609983	0.536	0.7	6.67299e-05
Dock4	3.25014e-09	-0.479901	0.605	0.782	7.55268e-05
Zfp710	6.86236e-09	-0.872777	0.267	0.451	0.000159468
Soga1	1.11268e-08	-1.19047	0.109	0.257	0.000258566
Fchsd2	1.42246e-08	-0.865022	0.277	0.458	0.000330551
Erc2	2.94341e-08	1.18993	0.248	0.122	0.00068399
Snhg11	3.10928e-08	1.02039	0.325	0.189	0.000722534
Zfhx3	4.73831e-08	-0.518829	0.589	0.75	0.00110109
mt-Atp6	6.65477e-08	0.738448	0.632	0.478	0.00154644
Hpgds	8.75451e-08	-0.913385	0.211	0.372	0.00203437
Ophn1	1.4887e-07	-0.847864	0.235	0.393	0.00345944
Mef2a	3.70834e-07	-0.704382	0.371	0.532	0.00861743
Dock8	4.44624e-07	-0.657013	0.275	0.445	0.0103322
Mgat4a	5.72402e-07	-1.00853	0.157	0.291	0.0133015
Arpp21	6.10291e-07	1.06037	0.251	0.135	0.0141819
Mbnl1	6.31642e-07	-0.582695	0.347	0.521	0.0146781
Myo1f	6.46426e-07	-0.818719	0.213	0.358	0.0150217
mt-Co1	7.1517e-07	0.712979	0.595	0.446	0.0166191
Ifitm10	8.5529e-07	-0.410829	0.483	0.661	0.0198752
Chn2	8.58192e-07	-0.858863	0.171	0.313	0.0199427
Zswim6	9.35225e-07	-0.761418	0.245	0.393	0.0217328
Dock2	1.3949e-06	-0.701131	0.28	0.427	0.0324146
Mef2c	1.41813e-06	-0.658888	0.461	0.581	0.0329546
Csmd1	1.90108e-06	0.681362	0.501	0.4	0.0441773
Inpp4b	1.95295e-06	-0.709922	0.264	0.414	0.0453827
Maml3	2.39286e-06	-0.545975	0.419	0.55	0.0556052
Adap2	3.00404e-06	-0.852925	0.171	0.301	0.0698078
Wnk1	3.08732e-06	-0.779861	0.221	0.359	0.0717432
Tmcc3	3.1283e-06	-0.37526	0.373	0.557	0.0726953
Kctd16	3.35606e-06	0.970346	0.269	0.16	0.0779882
Reep5	4.3276e-06	0.647828	0.309	0.189	0.100565
Naaladl2	4.34432e-06	0.295954	0.507	0.346	0.100953
Srgap2	4.47092e-06	-0.413706	0.555	0.683	0.103895
Chd9	4.85027e-06	-0.442719	0.448	0.602	0.11271
Frmd4a	4.98885e-06	-0.592474	0.456	0.573	0.115931
Pcdh15	5.56829e-06	0.854253	0.251	0.142	0.129396
Dlgap2	5.78814e-06	0.715116	0.299	0.178	0.134505
Cyth4	5.91518e-06	-0.859205	0.133	0.255	0.137457
Nrros	6.68229e-06	-0.758575	0.128	0.25	0.155283
Cacnb2	6.68995e-06	-0.799411	0.227	0.353	0.155461
Atp6v0b	6.7186e-06	0.478878	0.531	0.391	0.156127
Qki	9.59662e-06	-0.454445	0.437	0.595	0.223006
Gm11867	9.88649e-06	0.483886	0.387	0.25	0.229742
Tyrobp	1.04637e-05	0.741954	0.379	0.266	0.243156
Apbb1ip	1.05754e-05	-0.641204	0.28	0.42	0.245752
Lrfn5	1.31879e-05	0.748164	0.299	0.189	0.306461
mt-Co2	1.5076e-05	0.628457	0.483	0.361	0.350336
Gm2629	1.53385e-05	-0.609486	0.243	0.373	0.356435
Pip4k2a	1.84274e-05	-0.565703	0.285	0.42	0.428216
Rapgef5	1.96881e-05	-0.643613	0.323	0.438	0.457511
Trem2	2.17515e-05	0.575138	0.611	0.508	0.505461
Fyb	2.70245e-05	-0.608462	0.229	0.367	0.627996
Zbtb20	2.88439e-05	-0.630702	0.227	0.357	0.670273
Ltc4s	2.88955e-05	0.714072	0.339	0.231	0.671473
Mdga2	3.88734e-05	0.492429	0.371	0.247	0.903341
Pld3	5.20541e-05	0.668266	0.325	0.217	1
Rasgrp3	5.28512e-05	-0.810443	0.139	0.248	1
Pid1	6.27309e-05	-0.64077	0.272	0.387	1
Gab2	6.52712e-05	-0.588728	0.336	0.45	1
Etv6	7.27053e-05	-0.606379	0.232	0.354	1
Calm2	8.03532e-05	0.572988	0.408	0.305	1
Asic2	8.71191e-05	0.715026	0.312	0.211	1
Dleu2	0.000111053	-0.393419	0.493	0.61	1
E230029C05Rik	0.000121445	-0.538731	0.328	0.448	1
Tgfbr1	0.000140535	-0.382293	0.509	0.612	1
Zeb1	0.000158484	-0.666345	0.189	0.296	1
Plcl1	0.000186181	-0.605872	0.363	0.467	1
Dock10	0.000253307	-0.507121	0.307	0.422	1
Slco2b1	0.000323786	-0.518294	0.315	0.436	1
Mertk	0.000588984	-0.418492	0.523	0.624	1
St3gal6	0.000599724	-0.509993	0.243	0.349	1
Macrod2	0.000599766	0.443662	0.32	0.219	1
Entpd1	0.000659571	-0.49372	0.312	0.424	1
4933406I18Rik	0.0012006	-0.348578	0.32	0.429	1
Otulinl	0.00128384	-0.402953	0.349	0.451	1
Snx29	0.00150443	-0.500177	0.309	0.41	1
Lrch1	0.00227693	-0.409975	0.309	0.41	1
Lpcat2	0.00316121	-0.286158	0.408	0.513	1
Fli1	0.00385599	-0.382689	0.301	0.401	1

## Sheet: Oligodendrocyte_DEGs
gene	p_val	avg_log2FC (MK801/CTL)	pct.1	pct.2	p_val_adj
Xist	3.97058e-76	1.06951	0.928	0.629	9.22682e-72
Pde4b	1.47576e-57	-1.11996	0.689	0.897	3.42937e-53
Tmeff2	9.72853e-37	-1.03459	0.471	0.711	2.26071e-32
Plcl1	5.84584e-36	-1.201	0.371	0.628	1.35846e-31
Nkain2	9.80143e-36	-1.03216	0.514	0.713	2.27766e-31
Slc24a2	1.9739e-33	-1.16606	0.354	0.592	4.58694e-29
Sema3c	1.17713e-31	0.574658	0.711	0.475	2.7354e-27
St18	4.42367e-30	-1.07965	0.282	0.536	1.02797e-25
Mbp	7.16676e-29	-0.828616	0.386	0.629	1.66541e-24
Edil3	1.66865e-28	-0.95921	0.392	0.622	3.87761e-24
Dock10	3.38867e-28	-0.941748	0.362	0.593	7.8746e-24
Bcan	8.64214e-28	1.43454	0.449	0.264	2.00826e-23
Frmd5	3.51313e-27	-0.886245	0.382	0.617	8.16382e-23
Prr5l	8.30753e-27	-1.11123	0.205	0.431	1.9305e-22
Fnbp1	9.46718e-26	-1.10121	0.226	0.451	2.19998e-21
Cspg5	1.11775e-25	1.16715	0.531	0.357	2.59742e-21
Slc22a17	1.22158e-25	0.952139	0.619	0.467	2.8387e-21
Magi2	3.62386e-25	-0.633939	0.771	0.889	8.42112e-21
Matn4	5.49117e-25	1.30541	0.485	0.311	1.27604e-20
Cd81	2.47932e-24	0.69601	0.791	0.676	5.76145e-20
Cdk19	3.67879e-24	-1.20869	0.169	0.377	8.54878e-20
Mast4	5.63564e-24	-0.864648	0.398	0.603	1.30961e-19
Ptprd	1.21367e-23	-0.601767	0.682	0.854	2.82032e-19
Gm4258	1.62976e-22	-0.932901	0.302	0.518	3.78724e-18
Serpine2	2.95682e-22	1.24725	0.451	0.287	6.87105e-18
Gpr37l1	1.06103e-21	1.42554	0.325	0.164	2.46563e-17
Phlpp1	3.45386e-21	-0.765091	0.367	0.585	8.02608e-17
Pcsk1n	1.0561e-20	0.885484	0.641	0.52	2.45416e-16
mt-Nd1	1.559e-20	1.08658	0.556	0.396	3.62281e-16
D7Ertd443e	3.65485e-20	-1.44061	0.095	0.259	8.49313e-16
Ank2	6.07534e-20	-0.628224	0.569	0.754	1.41179e-15
Ano4	7.46201e-20	-0.942682	0.234	0.427	1.73402e-15
Mir100hg	1.47161e-19	-0.993951	0.236	0.43	3.41973e-15
Qki	5.50285e-19	-0.567507	0.629	0.798	1.27875e-14
Pllp	1.01123e-18	1.04536	0.429	0.274	2.3499e-14
Pex5l	1.24743e-18	-1.0152	0.269	0.455	2.89878e-14
Sec14l5	1.59587e-18	-1.35809	0.094	0.248	3.70849e-14
Zfp536	1.84566e-18	-0.715413	0.272	0.474	4.28895e-14
Pdgfra	4.27034e-18	1.13308	0.407	0.254	9.92342e-14
Erbin	1.0265e-17	-0.974134	0.171	0.347	2.38539e-13
Arhgap31	3.44209e-17	1.07417	0.421	0.28	7.99872e-13
Trf	3.48402e-17	-0.507568	0.298	0.502	8.09616e-13
Septin7	3.65776e-17	-0.879533	0.273	0.456	8.49989e-13
Ypel2	1.09883e-16	-1.20188	0.149	0.305	2.55345e-12
Gm16168	1.3139e-16	-1.07889	0.164	0.327	3.05325e-12
Slc8a1	2.23009e-16	-0.718361	0.3	0.484	5.18227e-12
Grm3	2.6758e-16	-0.998081	0.188	0.351	6.21802e-12
Ugt8a	3.11053e-16	-1.06315	0.16	0.316	7.22825e-12
Cd9	3.41871e-16	1.05836	0.471	0.342	7.9444e-12
Mbnl2	3.89832e-16	-0.70172	0.332	0.518	9.05893e-12
St6galnac3	4.20965e-16	-0.698258	0.331	0.517	9.78239e-12
Plp1	4.57127e-16	-0.402948	0.494	0.695	1.06227e-11
Pak1	4.86536e-16	-1.11632	0.131	0.281	1.13061e-11
Enox1	8.27492e-16	-1.1123	0.149	0.302	1.92293e-11
Gpr17	1.22863e-15	1.28932	0.322	0.192	2.85509e-11
Plxdc2	3.17728e-15	-0.990293	0.178	0.332	7.38337e-11
Rnf220	4.48621e-15	-0.896804	0.259	0.418	1.04251e-10
Tmem176b	8.40785e-15	1.446	0.304	0.185	1.95382e-10
Rap1gap	1.18604e-14	1.31635	0.276	0.156	2.75612e-10
Tecr	1.94391e-14	0.645801	0.596	0.49	4.51726e-10
Tmem178b	1.95773e-14	-0.731059	0.326	0.489	4.54938e-10
Exoc6b	2.94133e-14	-0.691769	0.268	0.441	6.83507e-10
Zeb2	7.03711e-14	-0.55255	0.509	0.678	1.63528e-09
Scrg1	7.5194e-14	1.19557	0.272	0.152	1.74736e-09
Tnr	7.67783e-14	0.465042	0.609	0.432	1.78417e-09
Arhgap23	1.6917e-13	-0.699077	0.235	0.392	3.93118e-09
Pde8a	2.04183e-13	-1.04822	0.118	0.251	4.74481e-09
Ctnna3	2.36261e-13	-0.905508	0.127	0.263	5.49024e-09
Prickle2	2.46125e-13	-0.662183	0.313	0.477	5.71945e-09
Kif1b	2.61313e-13	-0.641969	0.341	0.501	6.0724e-09
Ppib	3.73389e-13	1.04899	0.369	0.248	8.67681e-09
Nrxn2	3.76692e-13	0.739594	0.506	0.387	8.75357e-09
Olfm2	6.93251e-13	1.19128	0.296	0.182	1.61098e-08
Map7	1.24182e-12	-0.652636	0.273	0.432	2.88574e-08
Car2	1.35644e-12	-0.910953	0.139	0.27	3.1521e-08
Opcml	1.82421e-12	0.356958	0.795	0.682	4.2391e-08
Pakap	1.90043e-12	-0.897171	0.128	0.258	4.41623e-08
Adgrb1	2.50946e-12	1.15568	0.276	0.166	5.83148e-08
Mobp	3.20361e-12	-0.498645	0.234	0.4	7.44454e-08
Tulp4	3.64485e-12	-0.86178	0.173	0.31	8.4699e-08
Gjc3	5.31125e-12	-0.527945	0.386	0.545	1.23423e-07
Tubb4a	7.25811e-12	-0.63889	0.291	0.44	1.68664e-07
Baz2b	8.57228e-12	-0.714453	0.191	0.33	1.99203e-07
Pak5	1.20556e-11	-0.805864	0.246	0.385	2.80148e-07
B3galt1	2.5473e-11	-0.607614	0.254	0.402	5.91942e-07
Trim2	2.65549e-11	-0.77813	0.191	0.323	6.17082e-07
Nova1	2.68735e-11	0.82123	0.393	0.279	6.24486e-07
App	3.15945e-11	-0.493307	0.44	0.602	7.34194e-07
Tcf12	4.35976e-11	-0.623195	0.301	0.446	1.01312e-06
Pkp4	6.53728e-11	-0.731661	0.165	0.292	1.51913e-06
Frmd4b	1.09647e-10	-0.770547	0.141	0.264	2.54799e-06
Ptprz1	1.95633e-10	0.569506	0.488	0.357	4.54612e-06
Mog	2.01279e-10	-0.525534	0.195	0.333	4.67732e-06
ENSMUSG00000095041	2.23617e-10	-0.647901	0.252	0.389	5.19641e-06
Mal	2.3397e-10	-0.561341	0.201	0.334	5.43698e-06
Atp8a1	2.376e-10	-0.604537	0.288	0.438	5.52136e-06
Lrp1	2.52765e-10	0.992394	0.295	0.193	5.87375e-06
Ssh2	2.60273e-10	-0.641098	0.202	0.332	6.04822e-06
Cspg4	3.39622e-10	0.875116	0.302	0.195	7.89213e-06
Dnm3	3.48329e-10	-0.465879	0.386	0.541	8.09448e-06
mt-Nd4	3.6459e-10	0.865704	0.396	0.289	8.47235e-06
Bc1	4.12742e-10	0.58677	0.348	0.233	9.59129e-06
Ppp1r16b	4.6278e-10	-0.731104	0.172	0.294	1.07541e-05
Rtn4	7.37792e-10	-0.595924	0.306	0.441	1.71448e-05
Dscam	8.51832e-10	0.365551	0.581	0.438	1.97949e-05
Hecw2	9.68184e-10	-0.580296	0.321	0.461	2.24987e-05
Gab1	1.08413e-09	-0.76361	0.184	0.308	2.5193e-05
C030029H02Rik	1.4792e-09	-0.545852	0.144	0.262	3.43738e-05
Wnk1	1.5057e-09	-0.595532	0.179	0.304	3.49895e-05
Cdc42bpa	1.79453e-09	-0.61954	0.268	0.397	4.17013e-05
Gm3764	1.84028e-09	0.751639	0.378	0.269	4.27644e-05
Xylt1	2.27429e-09	0.440084	0.485	0.348	5.28499e-05
Cdc37l1	2.38448e-09	-0.594739	0.194	0.318	5.54105e-05
Kif13b	2.88293e-09	-0.887322	0.145	0.252	6.69934e-05
Enpp2	2.99379e-09	-0.454791	0.406	0.544	6.95697e-05
Clasp2	5.00384e-09	-0.503567	0.368	0.512	0.000116279
Csmd1	5.07776e-09	0.305706	0.758	0.643	0.000117997
Zfp638	5.32201e-09	-0.604211	0.193	0.315	0.000123673
Klhl2	6.93141e-09	-0.700298	0.215	0.334	0.000161072
Rnf13	7.14725e-09	-0.683545	0.152	0.262	0.000166088
Gpc5	7.46786e-09	0.358469	0.527	0.38	0.000173538
Slc12a2	8.38543e-09	-0.564033	0.153	0.268	0.000194861
Tmod2	9.68963e-09	-0.64683	0.159	0.269	0.000225168
Fgfr2	1.08023e-08	-0.730224	0.145	0.25	0.000251025
Ncam2	2.51809e-08	-0.444826	0.502	0.62	0.000585153
Bin1	4.35211e-08	-0.464203	0.227	0.347	0.00101134
Pafah1b1	7.48556e-08	-0.485536	0.241	0.366	0.00173949
Zcchc7	8.03651e-08	-0.580941	0.141	0.241	0.00186752
Unc5c	9.21999e-08	-0.407545	0.409	0.553	0.00214254
Dleu2	1.20645e-07	-0.530312	0.233	0.345	0.00280355
Ntm	1.54912e-07	0.348956	0.573	0.466	0.00359984
Limch1	2.44714e-07	-0.538169	0.198	0.303	0.00568667
Cdh20	2.51127e-07	-0.616224	0.235	0.34	0.00583569
Vmp1	2.86055e-07	-0.47653	0.271	0.389	0.00664735
Sox2ot	3.59085e-07	-0.304363	0.607	0.724	0.00834442
Map4	3.67234e-07	-0.541245	0.178	0.279	0.00853379
Elmo1	6.37625e-07	-0.491004	0.268	0.381	0.0148171
Zdhhc14	7.26898e-07	-0.441308	0.248	0.36	0.0168917
Gatm	8.36588e-07	-0.474662	0.241	0.351	0.0194406
Dock1	1.20793e-06	-0.527341	0.204	0.308	0.0280698
Rora	1.41062e-06	0.406351	0.486	0.385	0.0327801
Gpatch8	1.53601e-06	-0.463701	0.219	0.325	0.0356938
Sorcs1	2.26982e-06	-0.38405	0.361	0.475	0.0527462
Fa2h	2.37483e-06	-0.446134	0.227	0.328	0.0551863
Kif13a	2.5382e-06	-0.434687	0.214	0.316	0.0589827
Ank3	3.5444e-06	-0.259091	0.514	0.631	0.0823647
Tmcc1	3.98854e-06	-0.466255	0.306	0.41	0.0926858
Aatk	6.09131e-06	-0.315698	0.227	0.33	0.14155
Tbc1d5	1.494e-05	-0.377258	0.298	0.398	0.347175
Phldb1	1.71168e-05	-0.359461	0.285	0.39	0.39776
Nbea	3.37964e-05	-0.323445	0.366	0.475	0.785361
Ptprk	6.17017e-05	-0.296635	0.378	0.483	1
Scd2	9.31986e-05	-0.265813	0.378	0.481	1
