# Supplementary material for: Perineuronal oligodendrocyte and myelin renewal are epigenetically silenced contributing to cognitive deficits in a murine model of schizophrenia
Source: Research Square preprint supplement (doi:10.21203/rs.3.rs-8000305/v1), 2026-02-04
Supplement: Supplementary file 2 [file beaa266b07f4a4ea6fb1d361.docx]

**Perineuronal oligodendrocyte and myelin renewal are epigenetically silenced contributing to cognitive deficits in a murine model of schizophrenia**

***Running title: Oligodendrocyte and myelin renewal in schizophrenia***

Yuhao Cai1* (MD), Yao Chen1* (PhD), Mei Li1* (MD), Mengyao Zhao2 (MD), Min Jiang1 (PhD), Shuang Lin1 (MD), Binbin Tang1 (BD), Chao Zhang1 (BD), Guangdan Yu3 (PhD), Mingqi Lv4 (MD), Xiaoyan Yu4 (BD), Ai Guan4 (BD), Qing Jiang4 (BD), Wenhua Xie4 (BD), Jingyan Liang4 (BD), Qijing Lei1 (PhD), Yizhi Ma5 (MD), Jing Xie5 (PhD), Jianqin Niu3 (PhD), Lan Xiao3 (PhD), Liuyang Zhao2# (PhD), Bo Wen1,6# (PhD), Xianjun Chen1,7# (PhD).

1. Center for Medical Epigenetics, Department of Physiology, School of Basic Medical Sciences, Chongqing Medical University, Chongqing 400016, China.

2. Key Laboratory of Molecular Biology on Infectious Diseases, Ministry of Education, Chongqing Medical University, Chongqing 400016, China.

3. Department of Histology and Embryology, Chongqing Key Laboratory of Brain Development and Cognition, Brain and Intelligence Research Key Laboratory of Chongqing Education Commission, Key Laboratory of Extreme Environmental Medicine, Ministry of Education of China, Third Military Medical University (Army Medical University), Chongqing 400038, China.

4. Laboratory of Human Function, Experimental Teaching Management Center, Chongqing Medical University, Chongqing 400016, China.

5. Center for Medical Epigenetics, Department of Cell Biology and Genetics, School of Basic Medical Sciences, Chongqing Medical University, Chongqing 400016, China.

6. Key Laboratory of Metabolism and Molecular Medicine, Ministry of Education, Department of Biochemistry and Molecular Biology, School of Basic Medical Sciences, Fudan University, Shanghai 200032, China.

7. Lead contact.

* These authors contribute equally to this work.

# Correspondence:

[chenxianjun@cqmu.edu.cn](mailto:chenxianjun@cqmu.edu.cn); [bowen75@fudan.edu.cn](mailto:bowen75@fudan.edu.cn); liuyangzhao@cqmu.edu.cn

**Information about the corresponding author, Xianjun Chen:**

Full postal address: No. 1 Yixueyuan Road, Yuzhong District, Chongqing, China

Telephone number: (+86) 18623149737

E-mail address: [chenxianjun@cqmu.edu.cn](mailto:chenxianjun@cqmu.edu.cn)

**Supplementary methods**

**Human postmortem brain tissues and immunostaining**

Human schizophrenia and healthy comparable post-mortem tissues were provided by the National Health and Disease Human Brain Tissue Resource Center at Zhejiang University in China. Cases information has been described in Supplementary Table 1.

**Behavior tests**

**Open field test**

The open field test was used to detect locomotor activity and exploratory behavior of mice1. The mice were placed in the center of the open-field chamber (50 × 50 × 50 cm), and the data of total distance, percentage of central distance were recorded for 10 min.

**Elevated plus-maze test**

The elevated plus-maze test was conducted to assess anxiety-like behavior2. The apparatus with two opposite open arms (5 × 25 cm, 0.3 cm ledges) and two opposite closed arms (5 × 25 cm, 15 cm walls), was placed 55 cm above the floor. Each mouse was placed in the center, heading to an open arm, and explored for 5 min. The time and distance traveled within each arm were recorded.

**Three-chamber social test**

The three-chamber social test was performed with established protocol with slight modification3. Briefly, two plastic square box (7.5 × 7.5 × 9 cm, with equal 9 sniffing holes for each side) were placed in opposite corners of the three-chamber apparatus (20 × 40 cm for each chamber). After 10 min adaptation with empty boxes, a stranger mouse of the same gender was placed in one of the fixed boxes, the test mouse was allowed to explore for another 10 min to test sociability. For social novelty test, mice were recorded for 10 minutes with the familiar mouse and another stranger mouse placed in the opposite box. The number of contacts and time spent by the subject mouse approaching and exploring each box was measured. The social index was calculated as: time exploring stranger mouse / (time exploring stranger mouse + time exploring empty box or familiar mouse) 100%.

**Tail-suspension test**

The mice were tested separately with tails taped at a height of 30 cm. The first 2 min were regarded as adaptive training. The activity and total immobility times were recorded during the following 4 min.

**Forced swim test**

The test mice were forced to swim in a glass cylinder (diameter 13 cm, height 20 cm) for 6 min. The first 2 min were regarded as adaptive training. The activity and total immobility times were recorded during the following 4 min.

**Immunohistochemistry**

Immunofluorescence staining was performed as described in material and methods. Primary antibodies include: NF200 (1:200, Sigma-Aldrich, catalog no. N4142), SMI-32P (1:1000, Biolegend, catalog no. 801702).

**Transmission electron microscopy**

The mPFC samples had been perfused with 2.5% glutaraldehyde. Subsequent detection and capture of these samples were conducted at the Electron Microscopy Center of Chongqing Medical University. The images of these sections were analyzed using ImageJ-Fiji software (version 1.52p).

**Analysis of single-nucleus RNA sequencing and single-cell RNA sequencing**

The processing of Single-nucleus sequencing was described in material and methods. The phenotypes associated with *Setd1a* heterozygosity using scRNA-seq have been revealed by Chen and colleagues4. Here, we extracted mPFC samples of *Setd1a+/-* and control groups from the dataset (GSE181027). For quality control, cells were filtered to exclude those with fewer than 200 or more than 5,000 expressed genes, as well as those with mitochondrial content exceeding 10%. Only genes detected in three or more cells were retained for subsequent analyses. Additionally, batch effects were corrected using the "Harmony" package. Following these quality control procedures, a total of 8,224 cells from the *Setd1a+/-* group and 11,971 cells from the control group were included in downstream analyses. Subsequent analysis of the scRNA-seq results was performed using an R workflow based on the Seurat (v5) and ggplot2 packages. Differential expression genes (DEGs) in NFOLs between the wild-type (WT) and *Setd1a+/-* groups were identified using the "FindMarkers" function, with the threshold set at an adjusted *p*-value < 0.05.

**References**

1. Xu P, Xu H, Tang X, Xu L, Wang Y, Guo L *et al.* Liver X receptor beta is essential for the differentiation of radial glial cells to oligodendrocytes in the dorsal cortex. *Mol Psychiatry* 2014; **19**(8)**:** 947-957.

2. Katayama K, Yamada K, Ornthanalai VG, Inoue T, Ota M, Murphy NP *et al.* Slitrk1-deficient mice display elevated anxiety-like behavior and noradrenergic abnormalities. *Molecular Psychiatry* 2008; **15**(2)**:** 177-184.

3. Rein B, Ma K, Yan Z. A standardized social preference protocol for measuring social deficits in mouse models of autism. *Nat Protoc* 2020; **15**(10)**:** 3464-3477.

4. Chen R, Liu Y, Djekidel MN, Chen W, Bhattacherjee A, Chen Z *et al.* Cell type-specific mechanism of Setd1a heterozygosity in schizophrenia pathogenesis. *Sci Adv* 2022; **8**(9)**:** eabm1077.

**Supplementary Figure legends**

**Supplementary Figure 1. Analysis of behavioral outcomes of MK801 mice.**

**A.** Pattern diagram and quantification of the open field test (n=17 for CTL group, n=19 for MK801 group). **B.** Pattern diagram and quantification of the elevated plus maze test (n=21 for CTL group, n=17 for MK801 group). **C**. Pattern diagram and quantification of tail-suspension test (n=8 for CTL group, n=9 for MK801 group). **D.** Pattern diagram and quantification of forced swim test (n=9 for CTL group, n=10 for MK801 group). **E.** Pattern diagram and quantification of three-chamber social test (n=10 for CTL group, n=8 for MK801 group). Unpaired *t*-test was used, and data are expressed as the mean ± SEM, **p* < 0.05, or ***p* < 0.01.

**Supplementary Figure 2. Analysis of the density of neurons and neurofilaments in mPFC of MK801 mice.**

**A.** Representative images of neurons (NeuN+, red) and density in mPFC (n=5 for each group). Scale bar, 50 μm. **B.** Representative images showing the images and quantification of NF200 (red) and SMI-32P (green) positive axons in mPFC (n=5 for each group). Scale bar, 20 μm. Unpaired *t*-test was used, and data are expressed as the mean ± SEM.

**Supplementary Figure 3. Electron microscopy analysis of glutamatergic synapses and synaptic vesicles in mPFC of MK801 mice.**

**A.** Representative electron micrographs showing excitatory synapse (green background), and postsynapse (pink background). Scale bar, 0.5 μm. **B-D.** Quantification of the excitatory synapse, density of synaptic vesicles and PSD length in mPFC for CTL and MK801 mice (n=3 for each group). Unpaired *t*-test was used, and data are expressed as the mean ± SEM, *****p* < 0.0001.

**Supplementary Figure 4. Single-nucleus sequencing identifies cell types and cell chats in mPFC of MK801 mice.**

**A.** UMAP plot identifying the major cell types in mPFC, including, excited neuron (named as Exc_Neuron), astrocytes, inhibited neuron (named as Inh_Neuron), microglia, oligodendrocytes and endothelial. **B.** Dot plot showing average expression of key marker genes for 6 cell types. **C.** UMAP identifying 6 major cell clusters between CTL and MK801 groups (n=3 per group). **D.** Dot plot showing the expression of glutamate-related genes (pink background) in oligodendroglia lineage cells interacting with excited neurons between CTL and MK801 groups.

**Supplementary Figure 5. *Setd1a+/-*mice exhibit oligodendrocyte-specific transcriptional changes in the PFC.**

**A**. UMAP identifying oligodendroglia lineage cells, including OPC, newly formed OL (NFOL), and MOL between two groups (n=3 per group). **B.** Dot plots showing average expression of the known cell type markers for oligodendroglia lineage cell types. **C.** Stacked bar plot showing cell proportion of oligodendroglia lineage cell types between two groups. **D.** Bar graph showing the GO terms enriched in the DEGs of MOL in cellular component.
