# Supplementary material for: Perineuronal oligodendrocyte and myelin renewal are epigenetically silenced contributing to cognitive deficits in a murine model of schizophrenia
Source: Research Square preprint supplement (doi:10.21203/rs.3.rs-8000305/v1), 2026-02-04
Supplement: Supplementary file 3 [file c8e656ec44dbc4e20ffef81d.xlsx]

## Sheet: OPC_DEGs
gene	p_val	avg_log2FC (MK801/CTL)	pct.1	pct.2	p_val_adj
Xist	1.61123e-35	1.03182	0.975	0.595	3.74418e-31
Cd81	7.14512e-20	0.879989	0.853	0.728	1.66038e-15
Lrp1b	7.32073e-17	-0.529701	0.839	0.96	1.70119e-12
Sema3c	6.75545e-16	0.608165	0.74	0.521	1.56983e-11
Pcsk1n	1.49849e-15	0.910205	0.763	0.621	3.4822e-11
Bcan	1.29971e-14	0.930061	0.715	0.593	3.02028e-10
Cst3	1.62446e-14	0.791503	0.795	0.665	3.77493e-10
ENSMUSG00000095041	1.57672e-12	-0.970245	0.255	0.519	3.66399e-08
mt-Nd1	2.94489e-12	1.38653	0.552	0.381	6.84334e-08
mt-Co3	2.73277e-11	1.18153	0.657	0.528	6.3504e-07
Pllp	1.18645e-10	1.17575	0.469	0.307	2.75707e-06
Bsg	2.24936e-10	0.757196	0.628	0.498	5.22707e-06
Adgrb3	4.45852e-10	-0.515619	0.57	0.791	1.03607e-05
Sgcd	5.14024e-10	-0.498347	0.556	0.784	1.19449e-05
Tecr	5.61018e-10	0.908374	0.582	0.451	1.30369e-05
Gpr37l1	6.36985e-10	0.986701	0.503	0.347	1.48023e-05
Nxph1	8.35248e-10	-0.491054	0.69	0.842	1.94095e-05
Ncam2	9.81941e-10	-0.584104	0.524	0.758	2.28183e-05
Sox2ot	1.78876e-09	-0.454286	0.743	0.909	4.15672e-05
Itm2b	2.28453e-09	0.904663	0.611	0.505	5.30879e-05
Ppp2r2b	2.72239e-09	-0.60684	0.434	0.677	6.32629e-05
Pde4b	2.99616e-09	-0.537707	0.589	0.795	6.96247e-05
mt-Cytb	3.39115e-09	1.14693	0.526	0.395	7.88036e-05
Mir100hg	7.00719e-09	-0.901114	0.163	0.356	0.000162833
mt-Co1	8.36705e-09	1.16509	0.524	0.4	0.000194433
Il1rapl1	1.02032e-08	-0.364109	0.786	0.923	0.000237101
Sox6	1.56168e-08	-0.402707	0.628	0.828	0.000362904
Cd9	2.17267e-08	1.03108	0.517	0.409	0.000504885
Itm2c	2.18311e-08	0.799886	0.572	0.463	0.000507311
Csmd3	3.3553e-08	-0.368909	0.74	0.884	0.000779705
Klf12	3.3568e-08	-0.578429	0.306	0.537	0.000780053
Fgf14	3.87947e-08	-0.435106	0.699	0.865	0.000901512
Cd63	4.50543e-08	1.22447	0.363	0.219	0.00104697
mt-Co2	5.2323e-08	1.22207	0.434	0.312	0.00121588
Psap	5.46858e-08	0.772072	0.577	0.46	0.00127079
Arpp21	6.93788e-08	-0.778804	0.207	0.4	0.00161222
Dlg2	9.46064e-08	-0.354503	0.756	0.895	0.00219846
Grid2	9.55899e-08	-0.329551	0.768	0.902	0.00222132
Ppib	1.1992e-07	0.914191	0.487	0.365	0.00278671
Cadm2	1.36818e-07	-0.423017	0.752	0.872	0.00317938
Tmem176a	1.5983e-07	1.10346	0.386	0.256	0.00371414
Sntg1	1.74847e-07	-0.473064	0.57	0.756	0.0040631
Mdga2	2.62788e-07	-0.343828	0.782	0.916	0.00610667
Kcnh8	4.54417e-07	-0.873777	0.147	0.302	0.0105597
mt-Nd4	5.9935e-07	1.22436	0.375	0.251	0.0139277
Rev3l	7.76567e-07	-0.550993	0.349	0.556	0.0180459
Plcb1	8.17983e-07	-0.504407	0.48	0.66	0.0190083
Dpyd	1.01759e-06	-0.557031	0.333	0.537	0.0236467
Negr1	1.10426e-06	-0.511389	0.467	0.658	0.0256609
mt-Nd2	1.25354e-06	1.19433	0.359	0.228	0.0291297
Fmn2	1.58591e-06	-0.684038	0.138	0.291	0.0368535
Rbfox1	1.95501e-06	-0.333884	0.722	0.872	0.0454306
Npas3	2.8518e-06	-0.346767	0.653	0.807	0.0662702
Prkn	3.38831e-06	-0.501758	0.338	0.537	0.0787375
Adam22	3.61006e-06	-0.653911	0.12	0.256	0.0838906
Ank2	5.61854e-06	-0.407322	0.446	0.649	0.130564
Gm4258	5.99254e-06	-0.686388	0.244	0.407	0.139255
Brinp1	8.26776e-06	-0.531695	0.329	0.521	0.192126
Ctnna2	1.04761e-05	-0.334233	0.701	0.867	0.243443
Chl1	1.06425e-05	-0.621269	0.285	0.442	0.24731
Dok6	1.10662e-05	-0.71445	0.211	0.365	0.257156
Mfsd2a	1.12684e-05	1.10015	0.274	0.167	0.261855
Epn2	1.14076e-05	-0.338134	0.726	0.867	0.26509
Gm4876	1.19693e-05	-0.521979	0.331	0.514	0.278143
Grm7	1.34244e-05	-0.460759	0.301	0.484	0.311956
Chadl	1.51613e-05	1.09409	0.294	0.191	0.352318
Marchf1	2.02018e-05	-0.361451	0.625	0.812	0.46945
Ust	3.48164e-05	-0.577227	0.166	0.302	0.809064
Bach2	3.62536e-05	-0.601729	0.156	0.288	0.842461
Grm5	3.65541e-05	-0.534547	0.395	0.558	0.849445
Prkg1	3.69603e-05	-0.402953	0.467	0.653	0.858885
Zfp638	4.04551e-05	-0.624835	0.131	0.256	0.940095
Epha5	6.30594e-05	-0.477343	0.299	0.453	1
Pcdh11x	6.4196e-05	-0.506141	0.308	0.458	1
Dleu2	6.5416e-05	-0.63192	0.17	0.3	1
Slc8a1	6.61634e-05	-0.466385	0.232	0.388	1
Robo1	6.7255e-05	-0.361296	0.372	0.54	1
Ankrd11	7.72706e-05	-0.488258	0.317	0.47	1
Sox5	7.82115e-05	-0.368369	0.497	0.679	1
Ctnnd2	8.09557e-05	-0.256807	0.713	0.853	1
Ptprt	8.40041e-05	-0.351503	0.676	0.802	1
Adam12	9.55562e-05	-0.577701	0.202	0.337	1
Nrxn3	0.000103554	-0.281738	0.818	0.937	1
Rbms3	0.000105955	-0.593361	0.138	0.258	1
Tafa2	0.000137522	-0.626364	0.276	0.412	1
Zfpm2	0.000141059	-0.409946	0.26	0.407	1
Ncald	0.000145778	-0.419512	0.326	0.474	1
Pcdh7	0.000148396	-0.326846	0.508	0.688	1
Tmem178b	0.000153526	-0.448028	0.264	0.412	1
Tnik	0.000180512	-0.419498	0.285	0.442	1
Nrg1	0.000184921	-0.342579	0.361	0.533	1
Pbx1	0.000189974	-0.287212	0.439	0.637	1
Zeb1	0.000194186	-0.288711	0.618	0.77	1
Myt1	0.000203471	-0.622647	0.159	0.274	1
Nsd1	0.000204072	-0.418891	0.152	0.274	1
Macrod2	0.000212025	-0.307135	0.485	0.67	1
Sgcz	0.000213886	-0.336938	0.57	0.693	1
Thsd7a	0.000235117	-0.425419	0.237	0.381	1
Kansl1	0.000235471	-0.449163	0.301	0.456	1
Auts2	0.000291358	-0.335407	0.543	0.712	1
Rabep1	0.000373205	-0.478976	0.154	0.267	1
Mir99ahg	0.000377123	-0.399124	0.414	0.57	1
Ktn1	0.000377296	-0.511448	0.154	0.267	1
Lrmda	0.000379638	-0.50859	0.191	0.305	1
Ssh2	0.000381972	-0.575908	0.149	0.263	1
Mbd5	0.00040519	-0.396623	0.216	0.349	1
Tanc1	0.000405526	-0.57075	0.166	0.279	1
Ccser1	0.000434146	-0.390913	0.455	0.609	1
Prkd1	0.000440574	-0.454919	0.17	0.288	1
Ldlrad4	0.000453174	-0.352929	0.262	0.416	1
Ralyl	0.000507126	-0.328912	0.446	0.598	1
Unc13c	0.000530145	-0.376725	0.306	0.44	1
Fign	0.000535673	-0.470904	0.214	0.34	1
Gabrb3	0.000543185	-0.376438	0.156	0.27	1
Ebf1	0.000573507	-0.3726	0.147	0.256	1
Egfem1	0.000574519	-0.480121	0.241	0.372	1
Inpp4b	0.000575246	-0.399026	0.241	0.379	1
Nlk	0.000581493	-0.481852	0.166	0.279	1
Smyd3	0.000581731	-0.472515	0.191	0.307	1
Pde7b	0.000586386	-0.387829	0.294	0.435	1
Thrb	0.000586635	-0.377818	0.175	0.293	1
Psd3	0.000669331	-0.320368	0.2	0.328	1
Ntrk3	0.000707264	-0.289694	0.375	0.533	1
Exoc6b	0.000712984	-0.495864	0.177	0.288	1
Fbxl17	0.000745567	-0.434988	0.17	0.284	1
Dmd	0.000771588	-0.312802	0.531	0.719	1
Prkce	0.000779886	-0.402131	0.211	0.335	1
Cadps	0.000791801	-0.305756	0.285	0.433	1
Tmeff2	0.00080056	-0.383669	0.241	0.367	1
Sorcs1	0.000808959	-0.351282	0.409	0.56	1
Sorcs3	0.000859082	-0.300298	0.322	0.474	1
Dip2c	0.000864326	-0.269969	0.315	0.481	1
Gria2	0.000940908	-0.283443	0.483	0.674	1
Unc79	0.0010047	-0.430214	0.154	0.26	1
Ptprd	0.00105844	-0.336103	0.506	0.667	1
Kcnq1ot1	0.00115462	-0.553851	0.189	0.298	1
Setbp1	0.00117505	-0.342951	0.228	0.353	1
Pdzd2	0.00117923	-0.335382	0.179	0.293	1
Ncoa1	0.00118096	-0.259892	0.228	0.365	1
Dock1	0.00125382	-0.395686	0.228	0.351	1
Gpc6	0.0012605	-0.311791	0.379	0.537	1
Nckap5	0.00130408	-0.33845	0.432	0.577	1
Ppm1e	0.00132752	-0.327681	0.209	0.337	1
Slc9a9	0.00147638	-0.323013	0.207	0.326	1
Kcnip1	0.00149649	-0.359719	0.225	0.344	1
Setd5	0.00155678	-0.367765	0.182	0.288	1
Foxn3	0.00163546	-0.393852	0.241	0.365	1
Erc2	0.00174608	-0.35031	0.214	0.33	1
Ube2e2	0.00180767	-0.251374	0.308	0.463	1
Adarb2	0.00182943	-0.276492	0.575	0.709	1
Tox	0.0019066	-0.333126	0.269	0.398	1
Atp8a1	0.00203158	-0.452572	0.166	0.27	1
Cntn1	0.00203883	-0.263049	0.563	0.714	1
Phlpp1	0.00207913	-0.329816	0.216	0.337	1
Oxr1	0.00208954	-0.289882	0.253	0.377	1
Gm20754	0.0023228	-0.332988	0.264	0.393	1
Rims1	0.00237536	-0.268136	0.384	0.535	1
Grip1	0.00250018	-0.314963	0.214	0.33	1
Zswim6	0.00257446	-0.317635	0.17	0.272	1
Gm56750	0.00258203	-0.260726	0.257	0.388	1
Map2	0.00269001	-0.292889	0.317	0.46	1
Plppr5	0.00271293	-0.37031	0.26	0.377	1
Dab1	0.00274764	-0.361735	0.31	0.444	1
Xkr4	0.00299206	-0.2555	0.354	0.493	1
Atxn1	0.00306906	-0.328047	0.228	0.347	1
Rabgap1l	0.00313903	-0.250968	0.228	0.351	1
Nalcn	0.00330914	-0.377179	0.202	0.309	1
Myo5a	0.00334404	-0.364828	0.193	0.298	1
B3galt1	0.00371422	-0.351264	0.198	0.302	1
Nf1	0.00383683	-0.297137	0.241	0.365	1
Rgs7	0.00404955	-0.328564	0.326	0.458	1
Btbd9	0.00454566	-0.305954	0.2	0.307	1
Prickle2	0.00472881	-0.298693	0.223	0.337	1
Mapk10	0.00486032	-0.255448	0.248	0.365	1
Cdh10	0.00488634	-0.356177	0.361	0.486	1
Chd7	0.0053226	-0.355096	0.237	0.351	1
Lrrc7	0.00551888	-0.275479	0.347	0.477	1
Syn2	0.00562607	-0.397791	0.221	0.323	1
Plppr1	0.00595096	-0.334249	0.211	0.319	1
Mpped2	0.00595904	-0.334187	0.209	0.319	1
Mir9-3hg	0.00665525	-0.267737	0.474	0.619	1
Dgkb	0.00717055	-0.369918	0.308	0.421	1
Trio	0.00822249	-0.293934	0.267	0.381	1
Kalrn	0.00856341	-0.263401	0.209	0.312	1
Ptprk	0.00930497	-0.276454	0.317	0.44	1
Akap6	0.0106985	-0.281861	0.269	0.377	1
Sgip1	0.0127221	-0.306819	0.251	0.356	1
Cacna1a	0.012909	-0.259512	0.223	0.323	1
Fgf12	0.0150435	-0.280371	0.494	0.612	1
Akt3	0.0167699	-0.2661	0.267	0.372	1

## Sheet: NFOL_DEGs
gene	p_val	avg_log2FC (MK801/CTL)	pct.1	pct.2	p_val_adj
Xist	5.05814e-10	1.4539	1	0.508	1.17541e-05
Cd81	6.36275e-06	1.02848	0.909	0.778	0.147858
Cd9	9.66709e-06	1.23631	0.909	0.73	0.224644
Slc22a17	1.91813e-05	1.31355	0.8	0.587	0.445736
Dmd	4.43874e-05	-2.20101	0.091	0.444	1
Selenos	0.000107773	1.97967	0.509	0.222	1
Snap91	0.000276241	-2.15315	0.073	0.365	1
Crebbp	0.000311567	-1.61577	0.073	0.381	1
Usp32	0.000466275	-2.06821	0.073	0.349	1
Kdm4c	0.000502639	-2.20157	0.055	0.317	1
Cdc42se2	0.00053414	-1.45632	0.109	0.429	1
Zswim6	0.000536776	-1.23303	0.236	0.603	1
Ints6	0.000614868	-1.39032	0.182	0.508	1
Cyfip2	0.000624001	-0.662161	0.236	0.619	1
Chd9	0.000695797	-1.66582	0.091	0.381	1
Slc22a23	0.000699335	-0.831753	0.382	0.746	1
Gpatch8	0.000721769	-1.28167	0.2	0.556	1
Luzp2	0.000820355	-0.974779	0.564	0.873	1
Tcf7l2	0.000870878	-0.925292	0.636	0.873	1
Tmcc3	0.000877769	-1.86163	0.091	0.365	1
Asrgl1	0.00104784	-1.93721	0.091	0.349	1
Mib1	0.00109992	-1.96321	0.055	0.302	1
Lrch3	0.001107	-0.995967	0.291	0.667	1
Sox6	0.00112491	-0.945019	0.527	0.762	1
Nlk	0.00126716	-1.09998	0.182	0.508	1
Rnf216	0.0014414	-1.99506	0.036	0.254	1
Pcdh7	0.00172168	-0.572912	0.782	0.905	1
Mtmr10	0.00174046	-1.85484	0.055	0.286	1
Prpf4b	0.00178903	-1.85893	0.055	0.286	1
Tle4	0.00178903	-2.69283	0.055	0.286	1
Kdm6a	0.00196668	-2.53802	0.055	0.27	1
Nrd1	0.00199602	-1.73001	0.055	0.286	1
Sez6l	0.00205361	-0.850262	0.291	0.667	1
Prkg1	0.00209974	-1.10336	0.164	0.476	1
Gnao1	0.00211705	-1.39315	0.127	0.397	1
Slc16a7	0.00212313	-1.25881	0.073	0.317	1
Lingo2	0.00223983	-0.259883	0.127	0.429	1
Erbb4	0.00271241	-0.610356	0.673	0.905	1
Ktn1	0.00282314	-1.07525	0.145	0.429	1
Gtdc1	0.00329917	-1.72032	0.055	0.27	1
9530059O14Rik	0.00330441	-0.670132	0.709	0.857	1
Cd63	0.0034236	1.58103	0.473	0.302	1
Ubr3	0.00431543	-1.55737	0.091	0.317	1
Cntn1	0.00451957	-1.43647	0.273	0.508	1
Ephb1	0.00455154	-1.53445	0.2	0.444	1
Auts2	0.00479908	-0.764801	0.527	0.778	1
Ppp1cb	0.00499455	-1.94369	0.055	0.254	1
Khdrbs2	0.00512447	-0.924429	0.073	0.286	1
Ppp3ca	0.00552736	-0.720939	0.255	0.571	1
Phactr1	0.00567946	-0.843893	0.364	0.698	1
Map2k5	0.00578435	-0.748487	0.164	0.429	1
Cadm2	0.00587445	-0.767529	0.782	0.937	1
Kcnd2	0.00590259	-0.878765	0.164	0.429	1
Ppp2r5c	0.00592267	-1.01079	0.109	0.349	1
Arid4b	0.00598224	-1.07434	0.2	0.476	1
Alkbh1	0.00630449	-1.29143	0.055	0.254	1
Npas3	0.00657019	-0.827184	0.127	0.381	1
Ankrd11	0.00699731	-0.773965	0.127	0.381	1
Ccdc88a	0.00702042	-0.882309	0.073	0.286	1
Epn2	0.00713272	-0.65083	0.255	0.571	1
Kif21a	0.00721653	-1.0371	0.127	0.365	1
Atp1a3	0.00746786	-0.745635	0.145	0.413	1
Syp	0.00753889	-0.719356	0.073	0.286	1
Pafah1b1	0.00811425	-0.726887	0.236	0.54	1
Nalcn	0.00812542	-1.26744	0.109	0.333	1
Atrx	0.00812874	-1.51272	0.091	0.302	1
Ncam2	0.00813432	-0.62731	0.709	0.873	1
Spats2	0.00814954	-1.40183	0.073	0.27	1
Sik2	0.00854783	-1.25675	0.073	0.27	1
Fry	0.00904424	-1.2011	0.236	0.492	1
Dip2c	0.00907167	-0.993798	0.218	0.492	1
Atxn2	0.00909885	-1.21316	0.091	0.302	1
Dmxl1	0.00939698	-1.2791	0.073	0.27	1
Rinl	0.00951498	-1.21485	0.091	0.302	1
Ulk2	0.00964907	-1.15247	0.109	0.333	1
mt-Nd1	0.00970407	1.53462	0.527	0.397	1
Gtf2f2	0.00972934	-1.07424	0.091	0.302	1
Eml6	0.0100824	-1.37747	0.073	0.27	1
Sox2ot	0.0101081	-0.82438	0.345	0.635	1
Pcdh17	0.0102634	-0.600187	0.145	0.381	1
Ash1l	0.0102831	-1.27492	0.109	0.333	1
Gng12	0.0104746	-0.591745	0.127	0.365	1
Fth1	0.0108107	1.33406	0.418	0.238	1
Afap1l2	0.010812	-0.908039	0.073	0.27	1
Msi2	0.0114716	-0.752576	0.218	0.492	1
mt-Co2	0.0115652	1.43437	0.473	0.317	1
Adam22	0.0118369	-1.22678	0.127	0.333	1
Dok6	0.0118608	-0.917397	0.091	0.302	1
Lgi3	0.0120473	1.39164	0.491	0.333	1
Ssh2	0.012066	-1.03877	0.109	0.317	1
Arglu1	0.0121215	-0.734613	0.091	0.302	1
Parvb	0.0125858	-1.41825	0.127	0.333	1
Pllp	0.0128804	1.03639	0.545	0.429	1
Ep400	0.0131092	-1.30895	0.091	0.286	1
Sema4a	0.0131271	-1.23008	0.073	0.254	1
Sema5b	0.0131271	-1.55185	0.073	0.254	1
Mbd5	0.0134145	-0.821237	0.182	0.429	1
Ttc3	0.0135021	-0.580071	0.127	0.349	1
Slc25a36	0.0137475	-1.44446	0.073	0.254	1
Phf14	0.0141647	-0.913189	0.145	0.365	1
Prkce	0.0149652	-1.05783	0.2	0.413	1
Cdh20	0.0149782	-0.931692	0.345	0.587	1
Syt1	0.0153299	-0.902467	0.2	0.444	1
Arhgef2	0.0161266	-1.54431	0.091	0.27	1
Psme4	0.0164141	-1.01168	0.164	0.381	1
Gnas	0.0164955	-1.02504	0.073	0.254	1
Psd3	0.0171549	-1.07502	0.145	0.365	1
Tcf20	0.0175834	-1.31804	0.091	0.27	1
Mycbp2	0.0176769	-1.0511	0.127	0.333	1
Clu	0.0177054	-0.489628	0.164	0.413	1
Gm16168	0.0177477	-0.691267	0.327	0.619	1
Tmem132d	0.0177856	-1.04453	0.218	0.444	1
Sema3c	0.0178054	0.482982	0.727	0.556	1
ENSMUSG00000095041	0.0191561	-0.865659	0.345	0.587	1
Apba1	0.0197112	-0.676137	0.327	0.587	1
Gmds	0.0202497	-0.679771	0.127	0.333	1
Faf1	0.0204118	-1.24581	0.091	0.27	1
Nbea	0.0205653	-0.480895	0.218	0.476	1
Kmt2c	0.0209203	-0.707416	0.145	0.349	1
Frmd5	0.0211463	-0.541492	0.309	0.571	1
Snx29	0.0212896	-1.11773	0.091	0.27	1
Lcor	0.0217029	-0.733707	0.2	0.444	1
Ptprk	0.0224672	-0.977279	0.2	0.413	1
Arih1	0.0225907	-0.914054	0.109	0.302	1
Ncald	0.0227446	-0.700515	0.236	0.476	1
Adarb2	0.0229202	-0.7739	0.236	0.492	1
Fbn2	0.0229295	-1.29694	0.109	0.286	1
Cdh2	0.0229563	-0.737897	0.145	0.349	1
Map2	0.0236171	-0.565077	0.327	0.635	1
Ralgapa1	0.0238155	-0.610376	0.182	0.413	1
Clstn1	0.0239684	-0.837047	0.109	0.302	1
Dennd4a	0.0239809	-1.30726	0.091	0.254	1
Septin7	0.0240289	-0.416	0.291	0.603	1
Lima1	0.0244241	-0.625595	0.2	0.444	1
Sema6d	0.0249536	-1.15588	0.218	0.444	1
Map7	0.0250884	-0.448356	0.164	0.397	1
Tafa5	0.0255383	-1.28331	0.091	0.254	1
Cdk14	0.0258365	-0.52397	0.545	0.762	1
Negr1	0.0259985	-0.681642	0.364	0.667	1
Agpat4	0.0261337	0.905573	0.509	0.381	1
Cers5	0.0261887	-0.931795	0.091	0.27	1
Smg6	0.02621	-0.726118	0.145	0.365	1
Sema5a	0.0265865	-0.703183	0.418	0.667	1
Zcchc7	0.0267515	-0.612956	0.236	0.476	1
Nhsl2	0.0278818	-1.02634	0.145	0.333	1
Adgrl3	0.0280444	-0.511074	0.509	0.73	1
Npy	0.0284056	-0.892631	0.091	0.27	1
Plcb1	0.0290294	-0.701291	0.418	0.698	1
Ctnnal1	0.0290734	-0.694319	0.145	0.349	1
Abr	0.0299262	-0.468837	0.218	0.46	1
Plekha1	0.0311071	-1.10235	0.182	0.381	1
Rai1	0.0313078	-1.46182	0.109	0.27	1
Inpp4a	0.0322811	-0.812964	0.127	0.317	1
Itm2b	0.0322888	0.925218	0.491	0.333	1
A330076H08Rik	0.0325544	-1.33525	0.109	0.27	1
Zfp536	0.0325772	-1.36938	0.145	0.317	1
Pcdh9	0.0331149	-0.430181	0.727	0.921	1
Scrg1	0.033271	0.686948	0.473	0.333	1
Specc1	0.0333472	-1.07097	0.236	0.413	1
Csgalnact1	0.0334753	-0.548752	0.4	0.635	1
Susd4	0.0337367	-0.88551	0.273	0.492	1
Lrrtm3	0.0339714	-1.04368	0.145	0.333	1
Ltbp1	0.0345576	-0.628966	0.109	0.286	1
Klhl2	0.0345897	-0.626375	0.2	0.429	1
Kcnq1ot1	0.0347025	-0.587931	0.255	0.492	1
Rabgap1l	0.0353038	-0.862394	0.127	0.302	1
Wscd1	0.0359223	1.56181	0.364	0.238	1
Lamp1	0.0359379	1.21724	0.436	0.317	1
Gpr37l1	0.036827	0.996852	0.491	0.365	1
Xrn1	0.0375779	-0.812937	0.091	0.254	1
Pnisr	0.0378279	-0.677199	0.145	0.349	1
Ubxn4	0.0378479	-1.47172	0.109	0.254	1
Trpm7	0.0383272	-0.844229	0.091	0.254	1
Arhgef10	0.0393735	-0.528726	0.127	0.317	1
Hipk2	0.0406402	-0.577014	0.309	0.54	1
Pdia6	0.0414833	1.7841	0.273	0.159	1
Ctnna2	0.0428294	-0.305212	0.418	0.651	1
Il1rapl1	0.0431215	-0.352789	0.727	0.921	1
Pid1	0.0438413	-0.536387	0.127	0.302	1
Daam1	0.0439361	-0.624204	0.091	0.254	1
Ophn1	0.0440648	-0.715626	0.2	0.413	1
Pacs2	0.0459236	-0.333837	0.2	0.429	1
Nxph1	0.0463051	-1.03056	0.145	0.317	1
Atp1a1	0.0467289	1.38766	0.364	0.254	1
Wwox	0.0471034	-0.77205	0.145	0.317	1
Tmem178b	0.0477965	-0.745012	0.164	0.349	1
Nedd4	0.0479133	-0.608638	0.145	0.317	1
Papola	0.0484649	-1.31354	0.109	0.254	1
Dot1l	0.0493763	1.47121	0.255	0.127	1
Hip1	0.0496275	-0.780336	0.127	0.286	1
Thsd7a	0.0502174	-0.732626	0.109	0.27	1
9630013A20Rik	0.0520579	-0.713622	0.618	0.825	1
Magi1	0.052076	-0.673002	0.109	0.27	1
Gal3st1	0.0521461	1.54901	0.309	0.19	1
Setbp1	0.0522306	-0.539486	0.127	0.302	1
Lrrtm4	0.0523232	-0.420199	0.527	0.746	1
Ankrd17	0.0524042	-0.724749	0.182	0.381	1
Rc3h1	0.0549715	-0.695272	0.109	0.27	1
Nckap1	0.0554804	-0.62042	0.218	0.429	1
Tnrc6a	0.055966	-0.721762	0.109	0.27	1
Zfyve9	0.0561063	-1.21673	0.127	0.27	1
Nf1	0.0562353	-0.716874	0.291	0.492	1
Brwd1	0.0595499	-0.668206	0.145	0.317	1
Strn3	0.0599059	-0.771885	0.182	0.365	1
Epb41l2	0.0603014	-0.519783	0.455	0.651	1
Ppp2r3a	0.0606904	-0.463055	0.2	0.413	1
Cdyl	0.0611301	-1.01003	0.127	0.286	1
Pde4b	0.0625031	-0.44765	0.582	0.746	1
Trip12	0.0625448	-0.682037	0.145	0.317	1
Cux2	0.0632468	-0.584181	0.127	0.286	1
Unc5c	0.0632807	-0.599159	0.545	0.762	1
Hmg20a	0.0634104	-0.74293	0.218	0.413	1
Sptbn1	0.0636948	-0.562488	0.291	0.492	1
Tspan7	0.0638749	-0.410803	0.2	0.429	1
Ddx6	0.0648607	-0.939224	0.109	0.254	1
Plekhg1	0.0649014	-0.328951	0.255	0.46	1
Ntm	0.0649622	-0.424797	0.291	0.524	1
Tmcc1	0.066563	-0.774222	0.255	0.429	1
Myo5a	0.0667308	-0.659888	0.145	0.317	1
Camsap2	0.0667398	-0.455955	0.273	0.444	1
Fut9	0.0671997	-0.891826	0.109	0.254	1
Cmip	0.0683245	-0.538905	0.164	0.333	1
Fam193a	0.0688048	-0.677925	0.127	0.286	1
Abtb2	0.0691081	-0.592579	0.291	0.492	1
Trio	0.0700595	-0.311694	0.564	0.81	1
Stag1	0.0702142	-0.669398	0.2	0.381	1
Vcan	0.0723993	-0.407124	0.327	0.54	1
Man1a2	0.0735349	-0.412295	0.127	0.286	1
Strn	0.0735349	-0.266185	0.127	0.286	1
Gm4258	0.0739484	-0.604894	0.345	0.571	1
Nfia	0.0772306	-0.503559	0.145	0.302	1
Cntn4	0.0785275	1.45438	0.273	0.159	1
Gjc3	0.078853	-0.322341	0.618	0.825	1
Itpr2	0.0795241	-0.37444	0.509	0.73	1
Scaf8	0.0798179	-0.367295	0.127	0.286	1
Usp20	0.0802725	-0.795464	0.127	0.27	1
Kidins220	0.0811803	0.810414	0.364	0.254	1
Agap1	0.0812084	-0.706838	0.2	0.381	1
Shisal1	0.082917	-0.425068	0.2	0.365	1
Ehbp1	0.0829599	-0.702126	0.127	0.27	1
Cdk19	0.0853394	-0.481719	0.2	0.365	1
Nlgn3	0.0855842	-0.487232	0.109	0.254	1
Pcdh15	0.0862736	-0.593739	0.273	0.46	1
Ppib	0.0864304	1.01899	0.418	0.317	1
Ppp1r16b	0.0903703	-0.781563	0.182	0.333	1
Nipbl	0.0917313	-0.56824	0.145	0.302	1
Arhgef11	0.092945	-0.666112	0.127	0.27	1
Dnm3	0.0931407	-0.312233	0.6	0.81	1
Tmbim1	0.0940591	1.31562	0.291	0.19	1
AU040320	0.0944471	-0.51689	0.127	0.27	1
Lrrc4c	0.0957397	-0.459153	0.655	0.841	1
Arid1a	0.0959686	-0.538512	0.127	0.27	1
Iffo1	0.0975179	-0.548649	0.145	0.302	1
Dusp15	0.0975466	-0.389372	0.2	0.381	1
Pik3r3	0.0987526	-0.759367	0.455	0.619	1
Ambra1	0.100576	-0.727216	0.164	0.317	1
Lrrc4b	0.101721	0.798072	0.327	0.222	1
Reep5	0.102788	0.622724	0.509	0.397	1
Edil3	0.104663	-0.778808	0.127	0.254	1
Prtg	0.105158	-0.492434	0.145	0.302	1
Hnrnpm	0.106342	-0.756693	0.127	0.254	1
Zfr	0.106841	-0.358094	0.2	0.365	1
Atad2b	0.107343	-0.590916	0.145	0.286	1
Creb3l2	0.108043	-0.872528	0.127	0.254	1
Rab10	0.109437	-0.266743	0.164	0.333	1
Ckap5	0.109765	-0.858121	0.127	0.254	1
Sntg1	0.110515	-0.509563	0.182	0.333	1
Wipf1	0.111985	-0.737046	0.309	0.46	1
Arid1b	0.112284	-0.349307	0.127	0.27	1
Tjp1	0.113149	-0.428187	0.345	0.54	1
Rtn4	0.113224	-0.483848	0.473	0.651	1
Rere	0.116885	-0.628024	0.618	0.762	1
Ankrd28	0.11696	-0.414715	0.491	0.667	1
Arhgap35	0.118934	-0.520417	0.473	0.683	1
Mtdh	0.120971	-0.310196	0.218	0.413	1
Apba2	0.121672	-0.427457	0.164	0.302	1
Ppfibp1	0.124439	-0.532735	0.455	0.603	1
Ccser2	0.124477	-0.399358	0.255	0.429	1
Lrp1b	0.124857	-0.434521	0.564	0.714	1
Prpf40a	0.126255	-0.581912	0.127	0.254	1
Spacdr	0.126932	-0.295677	0.182	0.349	1
Sik3	0.127052	-0.54049	0.273	0.46	1
Sltm	0.130137	-0.417411	0.145	0.286	1
Ptpre	0.130317	0.723429	0.436	0.333	1
Nav3	0.130699	-0.393695	0.2	0.365	1
Pbrm1	0.132161	-0.377152	0.127	0.254	1
Astn2	0.13245	-0.315814	0.255	0.429	1
Plekha5	0.134351	-0.407964	0.164	0.302	1
Cacna1a	0.134909	-0.762713	0.145	0.27	1
Ccny	0.134909	-0.784534	0.145	0.27	1
Grik2	0.137546	-0.337617	0.655	0.825	1
Srrm2	0.138279	-0.467441	0.218	0.397	1
Csmd3	0.138935	-0.291469	0.309	0.492	1
Pik3r1	0.140921	-0.769891	0.145	0.27	1
Snd1	0.14185	-0.283722	0.145	0.286	1
Gria3	0.142477	-0.502017	0.127	0.254	1
Arhgef28	0.143344	-0.398806	0.291	0.46	1
Gse1	0.144612	-0.32921	0.127	0.254	1
Zfp638	0.144822	-0.340397	0.327	0.54	1
Zmiz1	0.145042	-0.577724	0.145	0.27	1
Nrxn1	0.145097	-0.684763	0.545	0.683	1
Maml2	0.145865	-0.351353	0.527	0.698	1
Sorcs1	0.148281	-0.746684	0.327	0.46	1
St18	0.151412	-0.344835	0.636	0.794	1
Hnrnph3	0.153808	-0.554744	0.218	0.381	1
Phf20l1	0.154914	-0.554139	0.164	0.286	1
Slc24a2	0.15539	-0.865549	0.182	0.302	1
Dip2b	0.15602	-0.464632	0.255	0.397	1
Pde4d	0.156295	-0.306833	0.6	0.73	1
Setd2	0.156306	-0.602015	0.164	0.302	1
Phyhipl	0.157375	-0.441567	0.291	0.444	1
Rbm39	0.157606	-0.504438	0.473	0.635	1
Gab1	0.160194	-0.430137	0.236	0.397	1
Chchd3	0.160195	-0.46305	0.145	0.27	1
Ralyl	0.161235	-0.310761	0.309	0.492	1
Eps8	0.162454	-0.312824	0.145	0.27	1
Lrrc8d	0.163939	-0.510804	0.2	0.333	1
Fam172a	0.16464	-0.523782	0.218	0.365	1
Sox5	0.164641	-0.41524	0.218	0.365	1
Prr14l	0.164737	-0.32553	0.145	0.27	1
Mboat2	0.168018	-0.584518	0.182	0.317	1
Dscam	0.168319	-0.316343	0.673	0.873	1
Ube2g1	0.1685	-0.778661	0.145	0.254	1
Mcu	0.171731	-0.261339	0.145	0.27	1
Tmem163	0.171907	-0.466082	0.491	0.667	1
Pak3	0.172909	-0.583574	0.2	0.365	1
Ptprz1	0.174313	-0.264711	0.291	0.46	1
Gtf2i	0.174509	-0.25349	0.273	0.444	1
Usp34	0.174943	-0.64852	0.182	0.302	1
Cnot3	0.17689	-0.394387	0.182	0.317	1
Rabgap1	0.181282	-0.549908	0.2	0.333	1
Mb21d2	0.181398	-0.499443	0.145	0.27	1
Grm5	0.183769	-0.391071	0.182	0.317	1
Asxl2	0.183769	-0.336591	0.182	0.317	1
Btbd9	0.184935	-0.773611	0.2	0.302	1
Jpx	0.186922	-0.489216	0.164	0.286	1
Rims2	0.189415	-0.403152	0.218	0.349	1
Tcf7l1	0.190378	-0.565207	0.218	0.365	1
Fam13c	0.192732	-0.524793	0.491	0.635	1
Bcas3	0.195672	-0.273499	0.182	0.317	1
Rbm25	0.197544	-0.500479	0.2	0.333	1
Far1	0.198799	-0.500776	0.145	0.254	1
Lhfpl3	0.201526	-0.295274	0.382	0.54	1
Dock9	0.203588	-0.286629	0.4	0.619	1
Fubp1	0.206086	-0.702689	0.164	0.27	1
Nkain2	0.206141	-0.819766	0.455	0.556	1
Bclaf1	0.207278	-0.298292	0.164	0.286	1
Fmnl2	0.212927	-0.320759	0.6	0.746	1
Spsb1	0.220726	-0.266626	0.218	0.349	1
Sema6a	0.233367	-0.341715	0.2	0.302	1
Nckap5	0.239697	-0.520068	0.491	0.667	1
Picalm	0.24514	-0.261492	0.145	0.254	1
Rsrc2	0.245937	-0.395078	0.164	0.27	1
Vps13b	0.258417	-0.30557	0.218	0.349	1
Mical3	0.261914	-0.312437	0.545	0.698	1
Akt3	0.266333	-0.317019	0.2	0.317	1
Macf1	0.269828	-0.402648	0.455	0.619	1
Man1c1	0.27957	-0.320599	0.182	0.286	1
Tbc1d5	0.279813	-0.320857	0.291	0.413	1
Mtmr3	0.280697	-0.361538	0.236	0.365	1
Dclk1	0.291501	0.314306	0.145	0.254	1
Slc9a9	0.29267	-0.295679	0.236	0.365	1
Dynll1	0.302353	0.388383	0.2	0.317	1
Elovl7	0.306696	-0.424188	0.236	0.349	1
Acsl3	0.331715	-0.386105	0.255	0.365	1
Dnaaf9	0.333804	0.310383	0.655	0.762	1
Wasf1	0.334005	-0.298894	0.2	0.302	1
Jmjd1c	0.341323	-0.367592	0.327	0.46	1
Tnrc6b	0.355093	-0.275455	0.255	0.365	1
Rin2	0.356487	0.330281	0.255	0.397	1
Ctsb	0.364561	0.541035	0.182	0.302	1
Zdhhc14	0.403475	-0.268013	0.636	0.778	1
Kif19a	0.431069	0.376617	0.218	0.333	1
Rtn3	0.452668	0.305795	0.255	0.381	1
Selenok	0.457451	0.4744	0.218	0.333	1
Large1	0.458182	-0.324766	0.491	0.619	1
Sgip1	0.47633	0.251432	0.2	0.302	1
Wdr33	0.486847	0.33385	0.218	0.333	1
Csmd2	0.505612	-0.285135	0.491	0.619	1
Mir99ahg	0.522524	0.460287	0.255	0.365	1
Bcar1	0.525657	0.442308	0.2	0.302	1
Sema4d	0.546248	-0.383079	0.455	0.556	1
Scd2	0.621252	0.288935	0.327	0.46	1
Pdcd4	0.728456	0.409831	0.382	0.524	1
Sst	0.735444	0.457211	0.455	0.571	1
Plcl1	0.858111	0.3547	0.436	0.556	1
Sox10	0.883045	0.485908	0.382	0.524	1
Aplp1	0.899396	0.340806	0.455	0.556	1
Atp6v0c	0.953776	0.321997	0.564	0.714	1
Phldb1	0.981527	0.259483	0.418	0.556	1

## Sheet: MOL_DEGs
gene	p_val	avg_log2FC (MK801/CTL)	pct.1	pct.2	p_val_adj
mt-Nd1	5.45475e-10	1.34072	0.536	0.368	1.26757e-05
Cldn11	8.99921e-10	0.660498	0.728	0.626	2.09124e-05
Adipor2	1.29676e-09	1.09024	0.43	0.248	3.01342e-05
Gsn	5.94988e-09	1.11574	0.511	0.359	0.000138263
Plcl1	1.68543e-08	-0.545287	0.757	0.895	0.000391661
Tmeff2	7.30478e-08	-0.449593	0.826	0.934	0.00169748
mt-Nd4	4.30673e-07	1.09028	0.434	0.283	0.010008
Pllp	9.00578e-07	0.925238	0.396	0.257	0.0209276
Rhog	1.11263e-06	1.35501	0.264	0.141	0.0258552
mt-Atp6	1.22401e-06	1.10363	0.566	0.431	0.0284436
Sema3c	2.51397e-06	0.430284	0.587	0.424	0.0584196
mt-Co3	2.74439e-06	0.947341	0.664	0.563	0.0637741
Xist	3.51028e-06	0.551382	0.804	0.665	0.0815719
Gjc3	4.05846e-06	-0.666993	0.383	0.582	0.0943104
Ubb	4.67239e-06	0.890587	0.404	0.274	0.108577
Cdh20	8.44354e-06	-0.873273	0.179	0.346	0.196211
mt-Co1	8.66225e-06	0.89589	0.57	0.468	0.201293
Edil3	1.2743e-05	-0.414998	0.672	0.83	0.296122
Ugt8a	1.30526e-05	-0.661063	0.272	0.45	0.303317
Abca2	2.31328e-05	0.646592	0.438	0.316	0.53756
Cdk19	3.09193e-05	-0.548136	0.353	0.557	0.718502
Fam168a	4.29124e-05	-1.02447	0.119	0.254	0.997199
Gm4258	5.4579e-05	-0.566287	0.421	0.596	1
Tcf12	8.57247e-05	-0.548104	0.34	0.514	1
Cd9	9.59447e-05	0.728524	0.391	0.284	1
Ank2	0.000107437	-0.407861	0.706	0.811	1
Dock10	0.000139539	-0.317076	0.677	0.812	1
Exoc4	0.000143038	-0.782356	0.153	0.287	1
Reep5	0.000157349	0.74908	0.421	0.319	1
Septin7	0.000167833	-0.521786	0.443	0.603	1
Mir100hg	0.000227663	-0.65612	0.323	0.479	1
Bc1	0.000255177	0.818153	0.26	0.159	1
Cdh10	0.000261312	-0.652779	0.255	0.392	1
Tulp4	0.000270228	-0.625117	0.238	0.384	1
Plxdc2	0.000301995	-0.531835	0.319	0.486	1
Ttc3	0.000574234	-0.786241	0.145	0.267	1
Kif1b	0.000659565	-0.372071	0.443	0.608	1
Unc5c	0.000804181	-0.502856	0.357	0.511	1
St18	0.000995151	-0.348127	0.698	0.856	1
Atp1b1	0.00100178	-0.520191	0.191	0.322	1
Slc8a1	0.00102383	-0.351708	0.37	0.518	1
Tmem178b	0.00105556	-0.464092	0.4	0.538	1
Cttnbp2	0.00138878	-0.707963	0.174	0.284	1
B3galt1	0.00153708	-0.413138	0.298	0.459	1
Sec14l5	0.00168791	-0.483354	0.294	0.439	1
Gm16168	0.0016944	-0.558751	0.323	0.45	1
Sox2ot	0.00175377	-0.458692	0.549	0.668	1
Enox1	0.00178133	-0.606129	0.251	0.375	1
Negr1	0.00187973	-0.568387	0.196	0.312	1
Nfia	0.00199204	-0.430363	0.213	0.341	1
Baz2b	0.00227988	-0.419531	0.251	0.382	1
Ypel2	0.00243824	-0.51174	0.362	0.496	1
Qki	0.00268147	-0.257338	0.745	0.847	1
Map4	0.00311783	-0.436393	0.221	0.345	1
Aspa	0.00343216	-0.509471	0.289	0.407	1
Grm3	0.00350615	-0.419205	0.417	0.543	1
Trim2	0.00481643	-0.406919	0.294	0.42	1
Mdga2	0.00502202	-0.426274	0.468	0.574	1
Ankrd28	0.00556081	-0.430772	0.234	0.355	1
Akap6	0.00557716	-0.450669	0.187	0.297	1
D7Ertd443e	0.00657034	-0.489534	0.311	0.423	1
Fnbp1	0.00718126	-0.319671	0.583	0.71	1
Myo6	0.00795858	-0.472583	0.238	0.348	1
Gab1	0.00923853	-0.488571	0.281	0.398	1
Shtn1	0.00994258	-0.45975	0.217	0.323	1
Pex5l	0.0111332	-0.379071	0.557	0.674	1
Ncam2	0.0119807	-0.431023	0.404	0.508	1
Zbtb20	0.012003	-0.267023	0.362	0.499	1
Gatm	0.0152164	-0.266571	0.328	0.459	1
Zdhhc14	0.0154683	-0.332044	0.234	0.338	1
Pak1	0.0159041	-0.358565	0.315	0.431	1
Ttll7	0.0190854	-0.42673	0.251	0.356	1
Nbea	0.0211626	-0.298313	0.328	0.443	1
Sorcs1	0.0287048	-0.28763	0.315	0.424	1
Erbin	0.0333492	-0.263973	0.387	0.509	1
Grid2	0.0381177	-0.263945	0.357	0.472	1
Hecw2	0.0468807	-0.293208	0.455	0.566	1
Il1rapl1	0.0476531	-0.342193	0.417	0.521	1
Tcf4	0.0559164	-0.290547	0.336	0.442	1
