# Supplementary material for: Perineuronal oligodendrocyte and myelin renewal are epigenetically silenced contributing to cognitive deficits in a murine model of schizophrenia
Source: Research Square preprint supplement (doi:10.21203/rs.3.rs-8000305/v1), 2026-02-04
Supplement: Supplementary file 4 [file fece92b21f00fd2ad5552fc3.docx]

**Supplementary Table 1. Information of human postmortem brain tissues.**

| **Case** | **Age** | **Sex** | **Post mortem interval(min)** | **Pathological diagnosis** | **Diagnostic report of brain bank** |
| --- | --- | --- | --- | --- | --- |
| 1 | 74 | male | 1200 | Hypertension;  Hyperlipemia | PART |
| 2 | 54 | female | 280 | Colon cancer;  Ovarian cancer | No abnormity |
| 3 | 32 | male | 536 | Dilated cardiomyopathy;  MODS | No abnormity |
| 4 | 77 | male | 360 | Schizophrenia | PART (2,0) |
| 5 | 58 | female | 150 | Schizophrenia;  hypertension | Schizophrenia;  PART (1,0) |
| 6 | 27 | male | 455 | Schizophrenia | No abnormity |

Control patients are labeled in blue letters, and Schizophrenia patients in red.
